1 **Title: Bacterial DNA on the skin surface overrepresents the viable skin**  
2 **microbiome**

3 **Authors:** Ellen M Acosta<sup>1</sup>, Katherine A Little<sup>1</sup>, Benjamin P Bratton<sup>1,2</sup>, Xuming Mao<sup>3</sup>, Aimee  
4 Payne<sup>3</sup>, Danelle Devenport<sup>1</sup>, Zemer Gitai<sup>1\*</sup>

5 **Affiliations:**

6 <sup>1</sup> Department of Molecular Biology, Princeton University, Princeton, NJ 08544, USA.

7 <sup>2</sup> Lewis-Sigler Institute for Integrative Genomics, Princeton University, Princeton, NJ 08544,  
8 USA.

9 <sup>3</sup>Department of Dermatology, University of Pennsylvania, Philadelphia, PA 19104, USA.

10 \*Correspondence to: [zgitai@princeton.edu](mailto:zgitai@princeton.edu)

11 **Abstract:** The skin microbiome provides vital contributions to human health and was  
12 historically assumed to be a well-mixed community that coats the skin surface. However, its  
13 spatial organization and viability remain unclear. Here we apply culturing, imaging, and  
14 molecular approaches to both human and mouse skin samples, and find that the skin surface is  
15 colonized by far few viable bacteria than would be predicted by its levels of bacterial DNA.  
16 Instead, viable skin-associated bacteria are primarily present in hair follicles and other cutaneous  
17 invaginations. Furthermore, we establish that a relatively small number of bacterial families  
18 dominate each skin site and that traditional sequencing methods overestimate the skin  
19 microbiome's richness and diversity. These findings address multiple outstanding questions in  
20 skin microbiome biology with significant implications for future efforts to study and manipulate  
21 it.

22 **Main Text:** The skin is the largest organ in the human body, providing roughly 25 square meters  
23 for potential host-microbe interactions (1). It facilitates our tactile interactions with the world,  
24 separates us from the dangers of our daily lives, and has the incredible ability to regenerate itself  
25 every 20-30 days (2). Human skin is also home to the organisms that comprise the skin  
26 microbiome, which has been shown to have important roles in human health. For example, the  
27 human skin microbiome affects immune system education (3, 4), wound healing (5–7),  
28 colonization resistance (8), modulation of gene expression in the skin (9), and may have a role in  
29 development (10). Despite the important contributions of the skin microbiome to human health,  
30 there are important questions that have not been addressed by traditional methods: Why is the  
31 skin microbiome stable across months in longitudinal studies yet easily perturbed upon transient  
32 environmental changes like swimming (11)? Why are there so many anaerobic bacteria on an  
33 organ exposed to the air? How can the microbes educate immune cells that are not found on the  
34 surface? And why is it so difficult to stably colonize the skin with new microbes without strong  
35 perturbations like abrasion?

36 The skin microbiome is often depicted as a well-mixed coating of microbes on the skin  
37 surface (12, 13). This assumption underlies both the paradoxes in the field mentioned above and  
38 the predominant method by which skin microbiomes have been studied: sequencing of swabbed  
39 skin areas (14). Additionally, while sequencing and culture-based studies have demonstrated that  
40 bacteria extend into deeper portions of the skin, the spatial distribution of the skin microbiome as  
41 a whole has not been well characterized (4, 15, 16). To address this gap, we determined the  
42 spatial distribution of bacterial cells in the skin using the universal bacterial FISH probe  
43 EUB338, which hybridizes to bacterial 16S rRNA (17). Using this method on biopsied healthy  
44 adult human tissues revealed that the skin surface contains very few intact bacteria (Fig.1 A). In

45 contrast, clusters of bacteria were found within hair follicles and other cutaneous skin structures  
46 like comedos (Fig.1 B). To quantify these observations, we calculated the ratio of the mean  
47 fluorescence within an area of interest (a hair follicle, the skin surface, or other cutaneous  
48 structures) to the mean fluorescence outside of the area of interest. We refer to this ratio as an  
49 enrichment score. The median enrichment score for human follicles was 11.24 (Fig. 1 D). In  
50 contrast, the skin surface (stratum corneum) had an enrichment score of just 0.188. This pattern  
51 of observing many bacteria in follicles but few on the skin surface held true when using FISH  
52 probes specific for *Cutibacterium acnes*, one of the most abundant bacterial species in the human  
53 skin microbiome (Fig. 1 C). For *C. acnes*, the enrichment score was 3.14 for follicles as  
54 compared to 0.67 for the stratum corneum (Fig. 1 D). We note that while the vast majority of  
55 intact skin-associated bacteria were not associated with the skin surface, there were some  
56 bacteria present in the stratum corneum. Thus, our results are consistent with previous reports  
57 that bacteria can be cultured from skin surface swabs but also extend these findings to  
58 demonstrate that the skin surface has fewer intact bacteria than deeper skin structures.

59 DNA sequencing of samples collected by sterile swabbing is the most common method  
60 used to evaluate the skin microbiome because it is simple, noninvasive, and has been shown to  
61 result in higher consistency than other sampling methods (18). However, because we observed so  
62 few bacterial cells on the skin surface, we questioned whether the bacterial DNA that is present  
63 on the skin surface and accessible for sampling by swabs is representative of the viable  
64 microbiome. We thus implemented a method that allowed us to quantify and compare total  
65 bacterial DNA with bacterial DNA found only within viable bacterial cells. Specifically, we  
66 utilized the cell-impermeable small molecule propidium monoazide (PMA), which binds  
67 irreversibly to double-stranded DNA upon photoactivation to inhibit PCR amplification (Fig. 2

68 A) (19). When PMA photoactivation is performed before the cell lysis step of DNA isolation, the  
69 genomic DNA inside viable bacteria is protected from PMA binding because PMA is cell-  
70 impermeable, while cell-free DNA or DNA within permeabilized bacteria becomes PMA-bound.  
71 Thus, comparing DNA quantities in samples with and without PMA treatment enables  
72 assessment of the viability of a bacterial population. This approach was previously used to assess  
73 the viability of bacteria from environmental waste water samples (20). To quantify bacterial  
74 DNA and assess the viability of a population of cells, we combined the use of PMA with droplet  
75 digital PCR (PMA-ddPCR).

76 To assure that PMA-ddPCR would allow us to reliably gauge the fraction of viable cells  
77 in a population, we first validated that it generated the expected results using known ratios of  
78 heat-killed and exponentially-growing *E. coli* cultures (Fig. S1A). As a further demonstration  
79 that PMA-ddPCR provides an accurate measure of DNA from viable cells, we next sought to  
80 determine whether PMA-ddPCR can accurately approximate the number of culturable bacteria.  
81 To this end, we used serial dilutions of a skin-resident bacterial species, *Staphylococcus*  
82 *epidermidis*, and generated a standard curve correlating DNA abundance (quantified by PMA-  
83 ddPCR) and CFU/mL (quantified by classical plating). We found that the PMA-ddPCR and  
84 CFU/mL values were highly correlated (Fig. S1B). Performing ddPCR without the use of PMA  
85 on an exponentially-growing population of *S. epidermidis* yielded similar results, indicating both  
86 that the PMA treatment itself does not significantly alter viability and that an exponentially-  
87 growing culture of bacteria is comprised of mostly viable cells (Fig. S1C). Together, these  
88 controls confirm that PMA-ddPCR represents a good proxy for the amount of DNA in a sample  
89 present within intact bacteria.

90           We next collected human skin microbiome samples using sterile swabbing technique to  
91 determine if our findings with *in vitro* bacterial cultures extend to skin microbiome samples. To  
92 quantify the number of viable bacteria directly, we plated a small amount of each sample using  
93 the standard conditions for culturing skin microbes (5% sheep blood in tryptic soy agarose plates  
94 incubated both aerobically and anaerobically). To determine whether PMA-ddPCR or traditional  
95 ddPCR better represented the number of viable skin microbiome bacteria, we split each sample  
96 into two equal halves and treated one half with PMA prior to DNA isolation, leaving the other  
97 half untreated. We quantified bacterial DNA in both samples by ddPCR using universal bacterial  
98 16S primers. We found that for each sample, the PMA-ddPCR quantification closely matched  
99 the standard curve generated with *S. epidermidis*, suggesting that the use of PMA allows for an  
100 accurate quantification of viable bacterial DNA (Fig. 2 B). More specifically, quantifying the  
101 bacterial DNA in skin microbiome samples without the use of PMA resulted in DNA quantities  
102 that were, on average, 82 times higher than predicted by the standard curve, while the use of  
103 PMA brought this value down to just 1.3 (Fig. 2 C). Using ddPCR counts to predict CFU showed  
104 similar results, as ddPCR in the absence of PMA yielded values that predicted CFU counts 58.5  
105 times greater than those measured, while PMA-ddPCR yielded values that predicted CFU counts  
106 that were on average only 1.28 times greater than the actual cultured CFU (Fig. 2 D).

107           Calculating the ratio of ddPCR counts between samples without PMA and samples with  
108 PMA allowed us to generate a viability score for any given microbiome sample. Additionally, we  
109 calculated a CFU-based viability score by comparing the CFU predicted by the ddPCR counts in  
110 a sample without the use of PMA to the actual CFU. Using either the ddPCR-based method or  
111 the CFU-based method resulted in similar viability scores and allowed us to gauge the overall  
112 fraction of viable bacteria in a population (Fig. 2 E).

113 We next evaluated viability scores (using the PMA-ddPCR-based method) of DNA  
114 sampled from different skin microbiome sites by swabbing the skin of four healthy human  
115 volunteers at eight sites (glabella, retroauricular crease, lower back, hair shaft, antecubital fossa,  
116 popliteal fossa, nares, and dorsal forearm) (Fig. 2 F, Fig. S2). PMA-ddPCR revealed that the  
117 viability scores for these sites ranged between 0.02 and 0.12 (0 represents a fully-nonviable  
118 population, 1.0 represents a fully-viable population), indicating that the majority of bacterial  
119 DNA found on the skin surface is not associated with viable cells (Fig. 2 G). To investigate  
120 whether this was a skin-specific phenomenon, we tested several non-skin microbiome sites  
121 (tongue, saliva, plaque, and feces). We found that in all non-skin microbiome sites, the viability  
122 score was significantly higher than for the skin, ranging from 0.4 (saliva) to 0.87 (feces) (Fig. 2  
123 G). These results provide independent support for our imaging-based findings that the skin  
124 surface is populated by few viable bacterial cells, indicating that the surface of healthy non-  
125 sterilized human skin is sparsely colonized. While these data indicate that bacterial DNA on the  
126 skin surface is predominantly not associated with viable bacterial cells, we note that our results  
127 do not suggest that there are no viable cells on the skin surface. Rather, our data indicate that the  
128 majority of the bacterial on the skin surface is not in intact bacteria such that specifically  
129 assessing the DNA associated with intact cells using PMA provides a much more accurate  
130 estimation of the viable skin microbiome.

131 Like many microbiomes, the existing knowledge of the skin microbiome is heavily based  
132 upon bacterial 16S rRNA gene amplicon sequencing, which was developed to assess bacterial  
133 populations while avoiding biases introduced by culturing methods. However, our findings  
134 suggest that using 16S rRNA gene amplicon sequencing to study the skin microbiome is not  
135 entirely unbiased, as most of the DNA in these samples is from nonviable bacteria and traditional

136 16S rRNA gene amplicon sequencing does not differentiate between DNA originating from live  
137 or dead cells. The inability of 16S rRNA gene amplicon sequencing to differentiate between  
138 these two types of bacterial populations has been mentioned as a potential downfall of the  
139 method, but has not been addressed (8). To evaluate how accurately traditional 16S rRNA gene  
140 amplicon sequencing captures the living skin microbiome composition, we utilized PMA  
141 followed by 16S rRNA gene amplicon sequencing (PMA-seq) (21). By sequencing pairs of  
142 matched samples with PMA treatment (PMA-seq) and without PMA treatment (traditional  
143 sequencing), we were able to explore how closely the microbiome compositions obtained from  
144 traditional sequencing methods resembled the viable microbiome composition obtained by PMA-  
145 seq. These experiments established that at each skin site sampled, as compared to traditional  
146 sequencing, the PMA-treated samples were less rich (richness,  $R$ , is a measure of the number of  
147 identifiable bacterial taxa) and less diverse (diversity,  $H$ , is measured by the Shannon diversity  
148 index) (Fig 3 A, B). Furthermore, samples that had greater richness in traditional sequencing  
149 ( $R_{\text{trad}}$ ) showed proportionally larger decreases in richness and Shannon diversity with PMA-seq  
150 ( $R_{\text{PMA}}$  and  $H_{\text{PMA}}$ ) (Fig. 3B-C). These results suggest that, although it appears by traditional  
151 sequencing that there is a wide range of richness values at different skin sites (1-30 different  
152 taxa), in reality the richness across the skin microbiome at different body sites is relatively  
153 similar and low (1-10 different taxa). Though we did identify a small number of samples where  
154 the richness increased upon PMA treatment, these increases were due mostly to minor  
155 components of the microbiome (Fig. 3C), and these samples still showed a decrease in Shannon  
156 diversity (Fig. 3B). Thus, though there appears to be a wide range of diversity in the skin  
157 microbiome by traditional sequencing, PMA-seq indicates that this is generally an

158 overestimation at any given skin site. In fact, our results suggest that the viable skin microbiome  
159 tends to be dominated by a relatively small number of taxa at most sites.

160 The metrics of richness and diversity offer important information regarding how the  
161 composition of the skin microbiome changes at different body sites between traditional  
162 sequencing and PMA-seq. However, we also wanted to understand the changes in the relative  
163 abundance of specific bacterial taxa. To quantify taxon-level PMA-dependent changes, we  
164 developed a PMA-index ( $I_{PMA}$ ) for each bacterial taxon, which is calculated as follows:

165  $I_{PMA} = \frac{A_{PMA}}{(A_{PMA}) + (A_{trad})}$ , where  $A_{PMA}$  is the relative abundance by PMA-seq and  $A_{trad}$  is the relative

166 abundance by traditional sequencing. A low PMA-index (below 0.5) indicates that the taxon in  
167 question is overrepresented by traditional sequencing, while a high PMA index (above 0.5)  
168 indicates that the taxon in question is underrepresented by traditional sequencing (Fig 4A).

169 Calculating PMA-indices revealed that the abundances of most bacterial taxa at any given body  
170 site are overestimated by traditional sequencing, as most taxa had PMA-index values close to 0  
171 (Fig. 4A).

172 The three most abundant family-level bacterial families (*Propionibacteriaceae*,  
173 *Corynebacteriaceae*, and *Micrococcaceae*) made up 93% of total sequencing reads (96% of  
174 PMA-seq reads and 91% of traditional sequencing reads) and demonstrated interesting family-  
175 level PMA-index patterns. The family *Propionibacteriaceae* includes a major component of the  
176 skin microbiome, *C. acnes*, which has been shown by traditional sequencing to comprise  
177 upwards of 50% of the skin microbiome irrespective of site type (8). PMA-seq revealed that  
178 traditional sequencing accurately represents *Propionibacteriaceae* abundance in sebaceous sites  
179 (demonstrated by a PMA-index close to 0.5), but overrepresents *Propionibacteriaceae* in moist  
180 and dry sites (PMA-indices of 0.2-0.3). Furthermore, *Propionibacteriaceae* dominated sebaceous



181 sites (accounting for >75% of all viable bacteria in most sebaceous samples), but did not  
182 dominate moist or dry sites (their viable abundance did not exceed 50% of all viable bacteria in  
183 any of those samples).

184 Bacteria in the family *Corynebacteriaceae* are also considered main constituents of the  
185 skin microbiome, but our results showed that traditional sequencing overestimates the abundance  
186 of *Corynebacteriaceae* at every skin site except for the nares. For example, traditional  
187 sequencing identified a high abundance of *Corynebacteriaceae* in the popliteal fossa, but PMA-  
188 seq showed that these reads were largely of inviable origin (Fig. 4B). Previous studies have  
189 demonstrated that *Corynebacteria* are readily cultured from nasal isolates, which supports our  
190 PMA-seq finding that viable members of this taxon are abundant in the nares but not at most  
191 other skin sites (22).

192 Interestingly, *Micrococcaceae* were overrepresented by traditional sequencing at every  
193 site except for the hair shaft. In the hair shaft, *Micrococcaceae* were abundant by PMA-seq but  
194 almost undetectable by traditional sequencing. As shown in Figure 4B, the increase in the  
195 relative proportion of viable *Micrococcaceae* detected by PMA-seq corresponds to a decrease in  
196 viable *Propionibacteriaceae*, suggesting that *Micrococcaceae* may not be detected by traditional  
197 sequencing because of the high abundance of DNA from inviable *Propionibacteriaceae*. These  
198 results suggest that most skin sites are colonized by a relatively small number of bacterial  
199 families and that different families distinctly colonize different skin sites.

200 Our sequencing did not show an abundance of *Staphylococcus*, which is often (12, 13,  
201 23), but not always (24), detected in the skin microbiome. We thus evaluated the viability of this  
202 genus using PMA-ddPCR with *Staphylococcus*-specific primers (Fig. S3). By using lysostaphin  
203 prior to DNA isolation, we ensured that any *Staphylococcus* present would be sufficiently lysed.

204 Comparisons with universal bacterial 16S primers confirmed that the inclusion of lysostaphin did  
205 not significantly change the overall viability scores at the body sites tested (Fig. S3). Meanwhile,  
206 our *Staphylococcus*-specific analysis confirmed that like other bacteria, *Staphylococcus* are also  
207 largely inviable on the skin surface (Fig. S3). These results reinforce our conclusion that the bulk  
208 of the bacterial DNA on the skin surface is from nonviable bacteria.

209 Finally, we were curious if our findings were human-specific, or if they also translated to  
210 murine systems. We thus assessed the spatial distribution of bacterial cells in mouse skin tissue.  
211 Using the universal bacterial FISH probe with tissue from K14-H2B-GFP mice revealed the  
212 same bacterial distributions as seen in the human tissues: a high abundance of bacteria in hair  
213 follicles (enrichment score of 15.26) with relatively few bacteria on the skin surface (enrichment  
214 score of 0.21) (Fig. 5 A, D). Given that one main function of the densely-packed coat of hair  
215 found on mammals like mice is to protect the skin surface from the outside environment, we  
216 wondered whether the lack of bacteria on the skin surface was due to their dense fur. To test how  
217 fur impacts the presence of bacteria on the skin surface, we performed FISH staining on skin  
218 from nude mice (SKH1-Hrhr Elite) and found similar bacterial distributions (follicle-associated  
219 enrichment score of 10.79 compared to 1.13 for the skin surface) (Fig. 5 B, D).

220 Since we failed to detect many bacteria on the surface of any of the skin samples tested,  
221 we sought a positive control to confirm that our FISH staining can visualize bacteria on the skin  
222 surface if they are present. To this end, we applied *Escherichia coli* cells to dorsal mouse skin  
223 tissue after removing it from the animal. This tissue was then processed in the same way as the  
224 human and other mouse tissue. FISH staining revealed many bacteria on the surface of these  
225 samples, confirming that this technique can be used to reliably visualize bacteria on the skin  
226 surface (Fig. 5 C). As a negative control, we also confirmed that a probe encoding the reverse

227 complement of the EUB338 FISH probe (NONEUB338) did not significantly stain the skin  
228 surface or follicles (Fig. 5 C).

229         Because our imaging of mouse skin suggested some similarity to human skin, we next  
230 decided to assess the viability of bacteria in the mouse skin microbiome using PMA-ddPCR. As  
231 further evidence that our previous findings are not human-specific, the PMA-ddPCR-based  
232 viability score for mouse skin microbiome sites was similar to the average viability score for  
233 human skin sites (0.066 and 0.045 respectively) and was much lower than the viability score for  
234 the mouse or human fecal microbiome (0.98 and 0.66 respectively). (Fig. 5E). Our results  
235 indicate that, despite having distinct skin biology, both humans and mice have an abundance of  
236 bacterial DNA on the skin surface that is not associated with viable cells. This observation  
237 suggests that the factors leading to this are also not unique to either given species and suggests  
238 that the presence of viable bacteria on the skin surface is rare for both humans and mice, and  
239 may thus represent a general phenomenon.

240         Here we used both imaging and PMA-based methods to demonstrate that the skin surface  
241 is sparsely colonized by bacteria. This central finding holds true across skin from human  
242 biopsies, healthy swabbed volunteers, hairy mice, and nude mice. The skin microbiome has  
243 garnered a great deal of attention as a means for educating the immune system, combatting  
244 pathogens, and promoting wound healing, and multiple groups are pursuing skin probiotics (25).  
245 Our findings have significant implications for the mechanisms underlying these skin microbiome  
246 functions, as well as for the ability to manipulate skin microbiome composition. For example,  
247 our findings support previous work suggesting that the key function of immune education by the  
248 skin microbiome occurs within hair follicles (4). Meanwhile, our results may explain why stably  
249 colonizing the skin surface with exogenous bacteria has proved to be difficult and often requires

250 abrasion (3). Disruption of the stratum corneum (skin surface layers), which occurs during skin  
251 abrasion, may allow access to the deeper layers of tissue where the stable bacterial populations  
252 reside. Thus, targeting the bacteria within hair follicles may represent a better strategy for stably  
253 manipulating the skin microbiome or educating the immune system. While it has been known for  
254 some time that bacteria inhabit hair follicles (4, 16), our findings extend this knowledge and  
255 suggest that the viable bacteria of the skin microbiome are primarily restricted to these sites. This  
256 is further supported by our finding that bacteria can be readily cultured from the skin surface, but  
257 at far less abundance than suggested by the amount of bacterial DNA present on the skin.

258       Our results also offer some insight into the apparent paradox of skin microbiome stability,  
259 in which skin microbiome composition has been found to be extremely stable over long time  
260 scales but highly susceptible to transient perturbations. A longitudinal study found that  
261 individual skin microbiome composition is consistent across months, while another study found  
262 that ocean swimming dramatically altered skin microbiome composition within hours (11, 26).  
263 The skin is primarily colonized by viable bacteria in pilosebaceous units and other skin  
264 invaginations and the bacterial DNA on the skin surface is mostly from dead bacteria. Thus,  
265 surface bacterial DNA could be easily washed away and replaced by other bacterial DNA from  
266 the environment, leading to low stability on short timescales. Meanwhile, the viable bacteria in  
267 hair follicles and other cutaneous structures may remain unperturbed by washing, persisting as a  
268 small but stable source of new bacterial DNA that replenishes the skin surface over time and  
269 leads to high stability at long timescales. In this scenario, hair follicles and other cutaneous  
270 structures could serve as the primary site of replication for the bacteria of the skin microbiome,  
271 which are eventually pushed out towards the skin surface. At the surface, the DNA from dead  
272 bacteria that originated from distinct skin sites can mix, which would provide an explanation for

273 why traditional sequencing overrepresents bacterial diversity. This model would also explain the  
274 counter-intuitive abundance of obligately anaerobic bacterial species associated with the skin  
275 microbiome. We note that human skin cells are also born in stem-cell-rich invaginations and are  
276 pushed to the surface as they die. In this way, the life cycle of the skin microbiome may resemble  
277 the process of epithelial cell turnover in the skin.

278 Our findings also raise fundamental questions that will need to be addressed by future  
279 studies focused on why the skin surface is poorly colonized. The accessible DNA in non-skin  
280 microbiomes is generally representative of viable bacterial cells, as all non-skin microbiomes  
281 tested had viability scores above 0.4. This is in stark contrast to the skin microbiome, which had  
282 viability scores between 0.02 and 0.12. Even saliva, which contains a multitude of antimicrobial  
283 compounds such as lysozyme, lactoferrin, lactoperoxidase, and antimicrobial peptides (27), had a  
284 viability score nearly four times greater than the highest viability score for a skin microbiome.  
285 The uniquely low viability score associated with the skin could be explained by passive  
286 mechanisms, like bacterial DNA adhering to the skin long after a bacterial cell dies.  
287 Alternatively, there could be active mechanisms like bacterial killing on the skin surface by  
288 factors like antimicrobial peptides produced by epithelial cells, competition between bacterial  
289 species, or exposure to harsh environmental factors such as starvation, UV radiation, or  
290 desiccation.

291 In conclusion, we have shown for the first time the spatial distribution of the viable skin  
292 microbiome in its native state. Our data challenge the assumption that the skin surface is replete  
293 with viable bacterial cells, and suggest instead that the bacterial DNA on the skin surface is not  
294 representative of the viable bacterial population. Our findings also suggest that traditional 16S  
295 rRNA gene amplicon sequencing is not sufficient for analyzing bacterial communities like the

296 skin microbiome, as it leads to overestimation of richness and diversity and can lead to  
297 inaccurate assessment of bacterial abundance. PMA-seq is thus a powerful tool for assessing the  
298 viable components of a complex community, and, when coupled with traditional sequencing, can  
299 also evaluate how closely the available DNA reflects the viable components within a community.  
300 Our results provide an essential step towards a complete understanding of the functional skin  
301 microbiome and suggest a more accurate method to evaluate bacterial communities on the skin  
302 surface.  
303

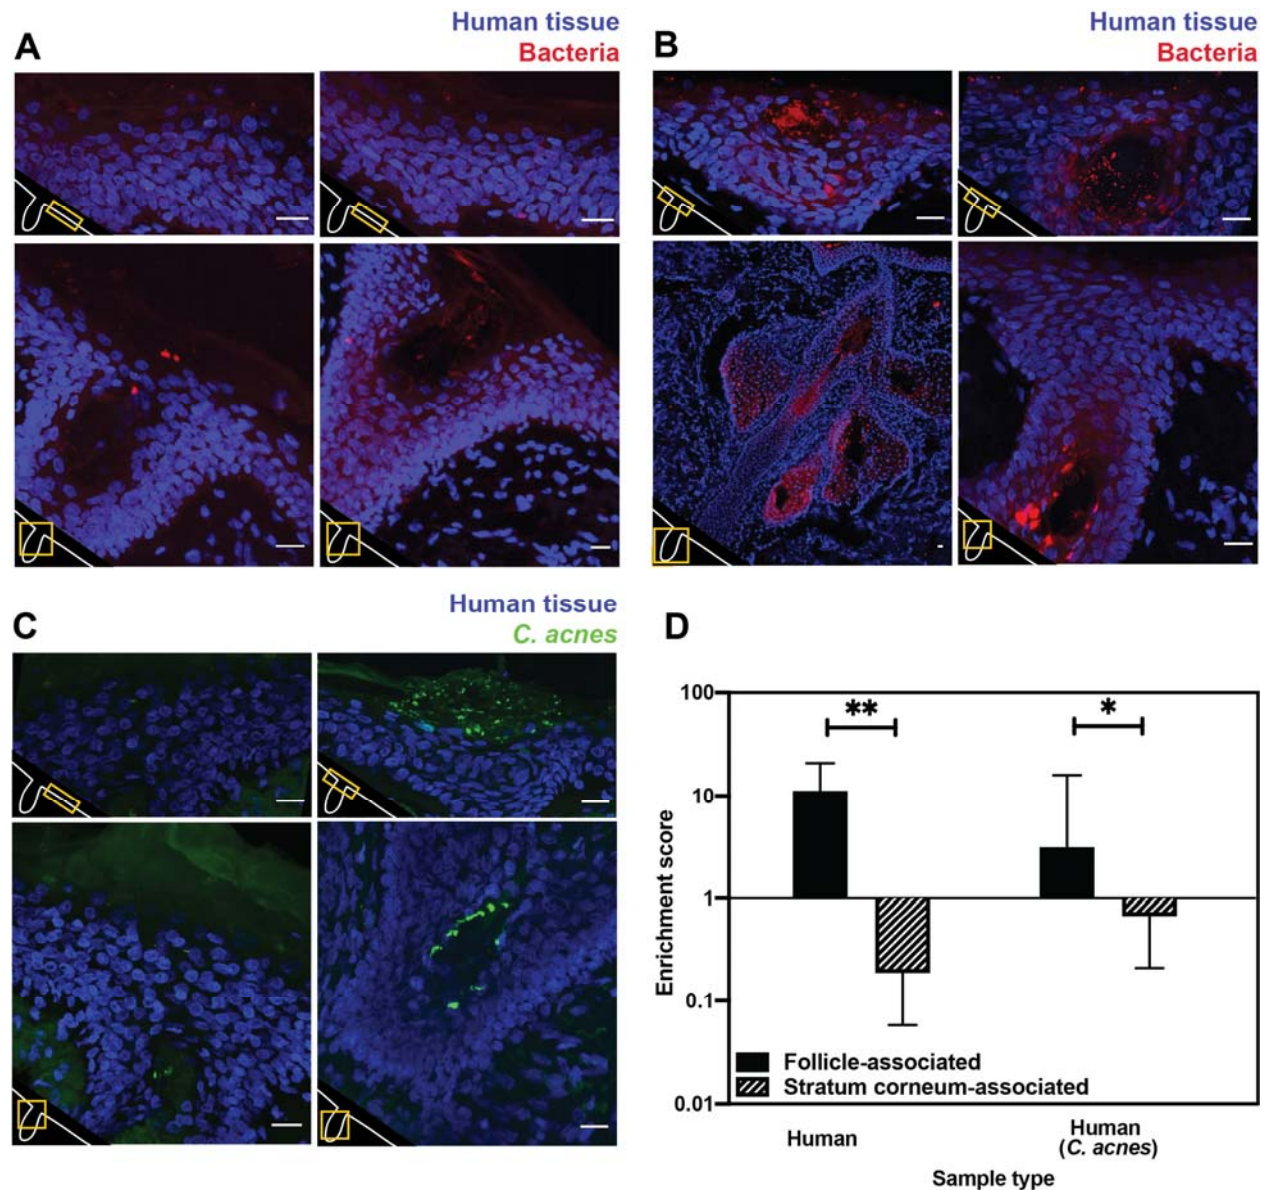

304

305 **Fig. 1.** Bacterial FISH staining of human tissue. (A-C) Scale bar = 20  $\mu$ m. The bottom left corner  
306 of each diagram shows a schematic of the hair follicle in white and the anatomic location of each  
307 image frame in yellow. DAPI staining is shown in blue in all parts. EUB338 hybridization is  
308 shown in red for all images. (A) Human tissues stained with the pan-bacterial FISH probe  
309 EUB338 show little bacterial presence at the skin surface. (B) Human tissues stained with  
310 EUB338 show abundant bacterial signal that is concentrated in hair follicles, pilosebaceous units,

311 and other cutaneous structures. (C) Human tissues stained with a *C. acnes* specific FISH probe  
312 (in green) demonstrate the same overall spatial organization as those stained with EUB338. (D)  
313 Quantification enrichment scores showing the median and interquartile range. Significance was  
314 calculated using the Mann-Whitney test. \* $P \leq 0.05$ , \*\* $P \leq 0.01$ . N = 8 for human follicle, N = 6  
315 for human follicle (*C. acnes*) and human stratum corneum, N = 5 for human stratum corneum (*C.*  
316 *acnes*).

317



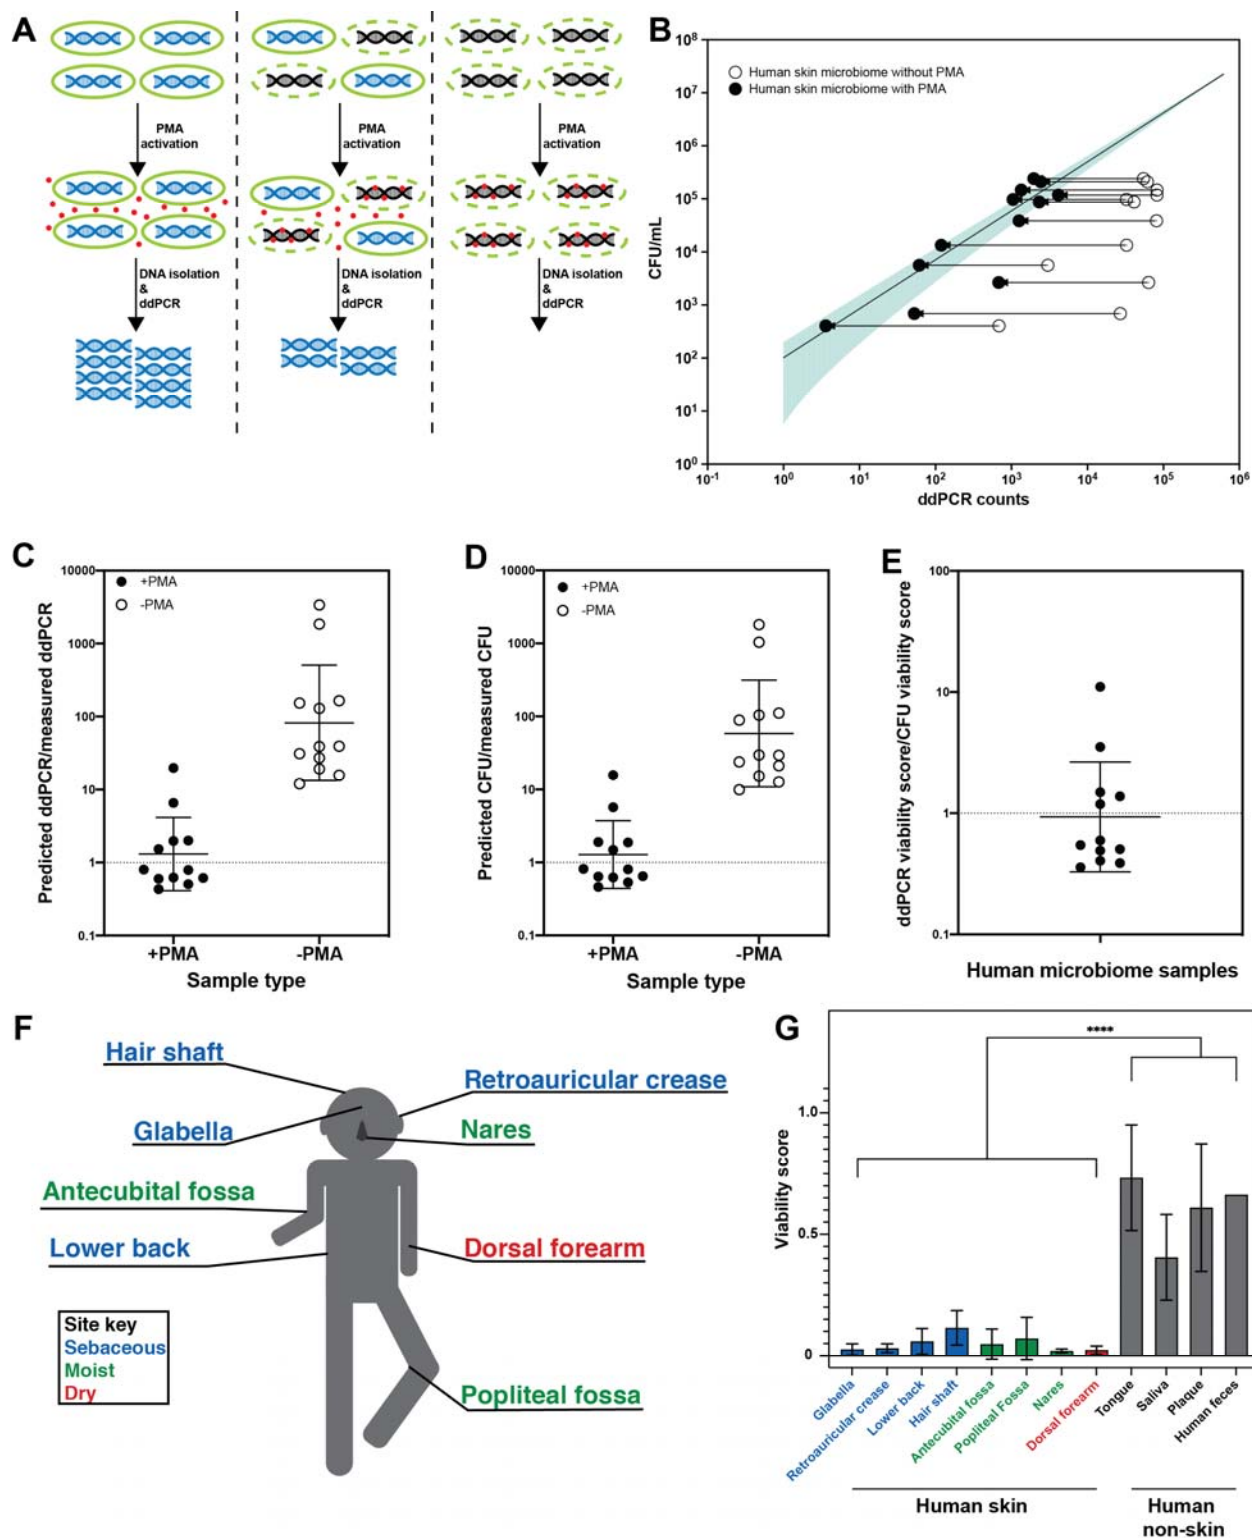

318

319 **Fig. 2.** PMA-ddPCR and viability scores for human skin and non-skin microbiomes . (A)

320 Schematic of the PMA-ddPCR workflow. (B) Standard curve generated using *Staphylococcus*

321 *epidermidis* cultures shown in green. Shading represents 95% confidence interval. Open and  
322 closed circles represent skin microbiome samples that did (closed circles) or did not (open  
323 circles) receive PMA treatment. Paired samples are connected with a left-facing arrow to show  
324 the downward shift in DNA abundance with the inclusion of PMA. (C) Comparison of the  
325 predicted ddPCR counts to measured ddPCR counts based on CFU for samples that were treated  
326 with PMA (closed circles) and samples that were not treated with PMA (open circles) (mean for  
327 PMA-treated samples is 1.31, mean for untreated samples is 82.2) . (D) Comparison of the  
328 predicted CFU to measured CFU based on ddPCR for samples that were treated with PMA  
329 (closed circles) and samples that were not treated with PMA (open circles) (mean for PMA  
330 treated samples is 1.28, mean for untreated samples is 58.5). (E) Comparison of ddPCR-based  
331 viability score to CFU-based viability score (mean = 0.93). (F) Sampling scheme showing each  
332 skin site that was sampled. Colors indicate site-type (sebaceous in blue, moist in green, dry in  
333 red). (G) PMA-ddPCR on skin and non-skin microbiome sites shows that the viability score of  
334 the skin microbiome is significantly lower than other microbiome sites. \*\*\*\*P  $\leq$  0.0001 for  
335 Student's T Test on pooled skin and non-skin samples. Four volunteers contributed skin and non-  
336 skin microbiome samples. Additional samples were collected from some individuals and  
337 represent biological replicates. N= 8 for glabella, N = 6 for retroarticular crease, N = 5 for lower  
338 back, hair shaft, nares, and dorsal forearm, N = 3 for antecubital fossa, tongue, saliva, and  
339 plaque, N = 2 for popliteal fossa, and N = 1 for human feces. For raw ddPCR counts, see Fig. S2.  
340

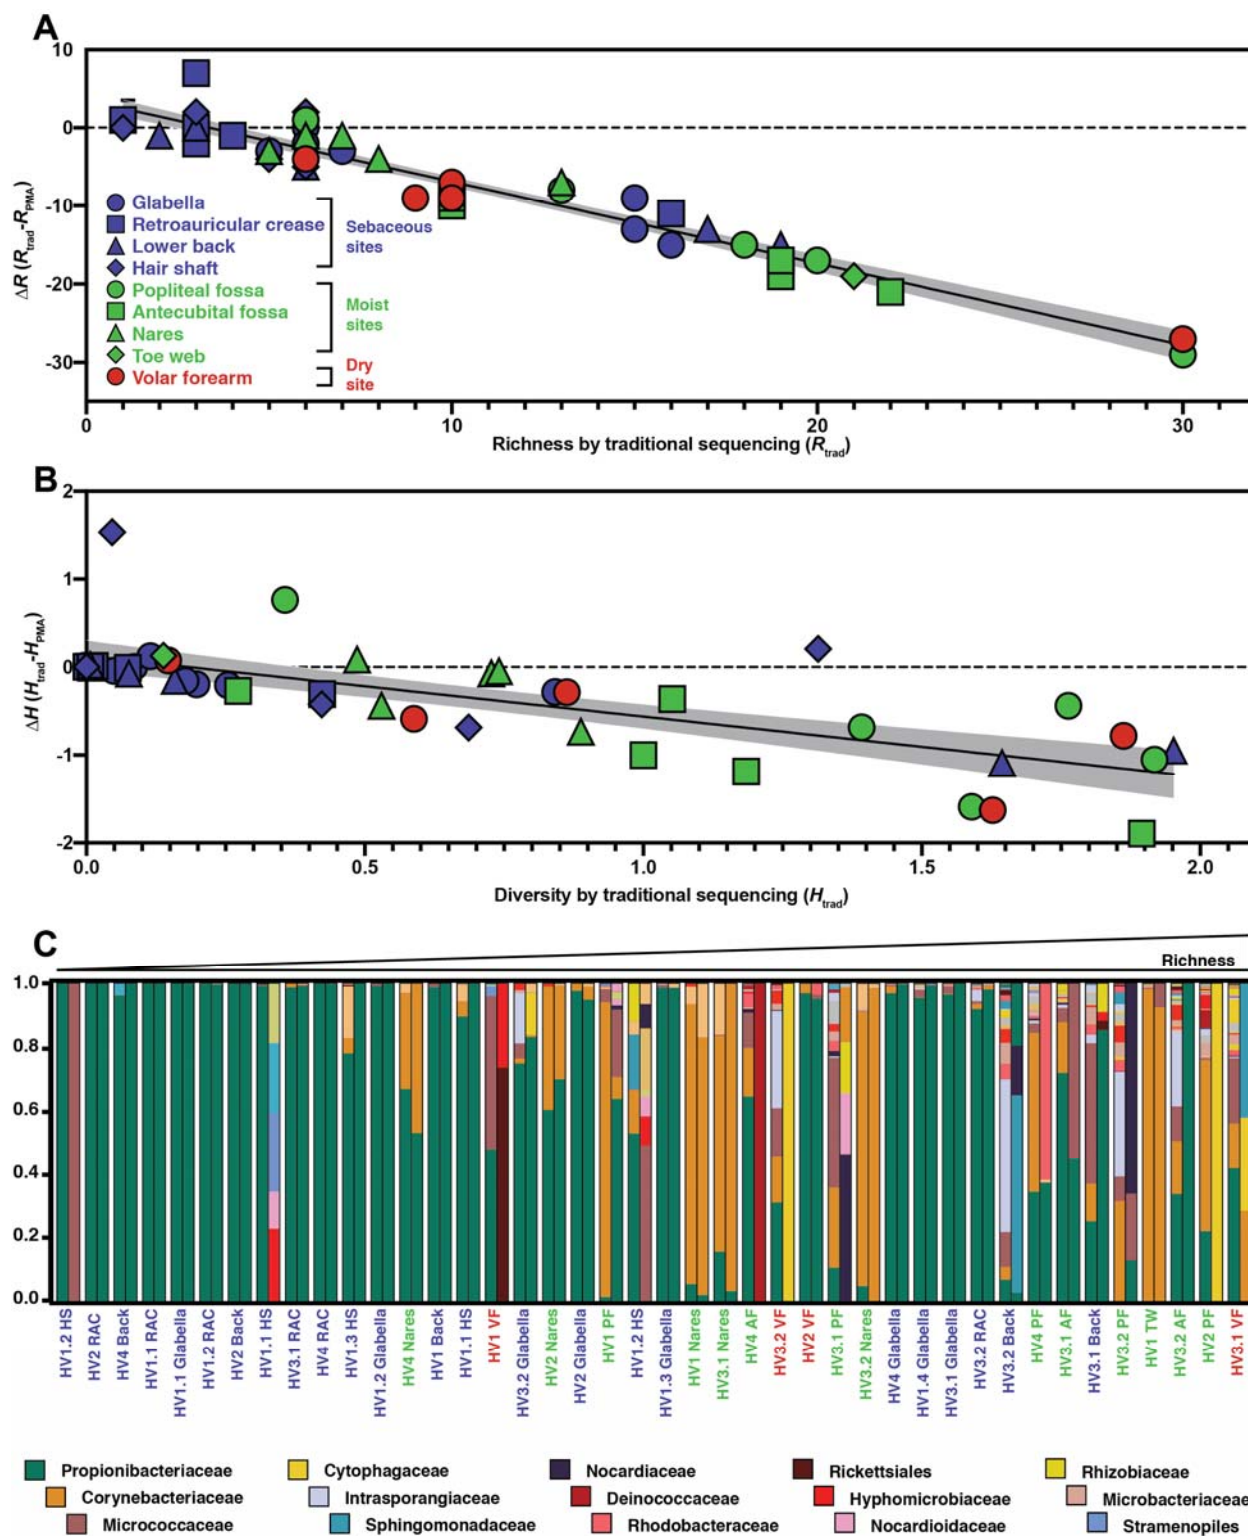

341  
 342 **Fig. 3.** Richness and Shannon diversity of traditional sequencing compared to PMA-seq. (A) The  
 343 richness changes between traditional sequencing ( $R_{\text{trad}}$ ) and PMA-seq ( $R_{\text{PMA}}$ ) are demonstrated

344 by plotting the change in richness ( $\Delta R$ ) against  $R_{\text{trad}}$ . Colors represent different site types and  
345 shapes represent different sample sites. The shaded gray region represents the 95% confidence  
346 interval for the linear regression. (B) The Shannon diversity changes between traditional  
347 sequencing ( $H_{\text{trad}}$ ) and PMA-seq ( $H_{\text{PMA}}$ ) are demonstrated by plotting the change in diversity  
348 ( $\Delta H$ ) against  $H_{\text{trad}}$ . Colors, shapes, and gray shading are the same as in (A). (C) Relative  
349 abundance of the 15 most abundant bacterial taxa overall (listed in descending order below).  
350 Paired bars represent data from traditional sequencing (left) and PMA-seq (right). Samples are  
351 ordered by increasing richness in traditional sequencing. Labels below each pair of bars indicate  
352 each sample's donor, replicate, and site (for example, HV1.1 RAC indicates Healthy Volunteer  
353 1, replicate sample 1, retroauricular crease). HS: hair shaft, RAC: retroauricular crease, VF: volar  
354 forearm, PF: popliteal fossa, TW: toe web, AF: antecubital fossa.

355

356

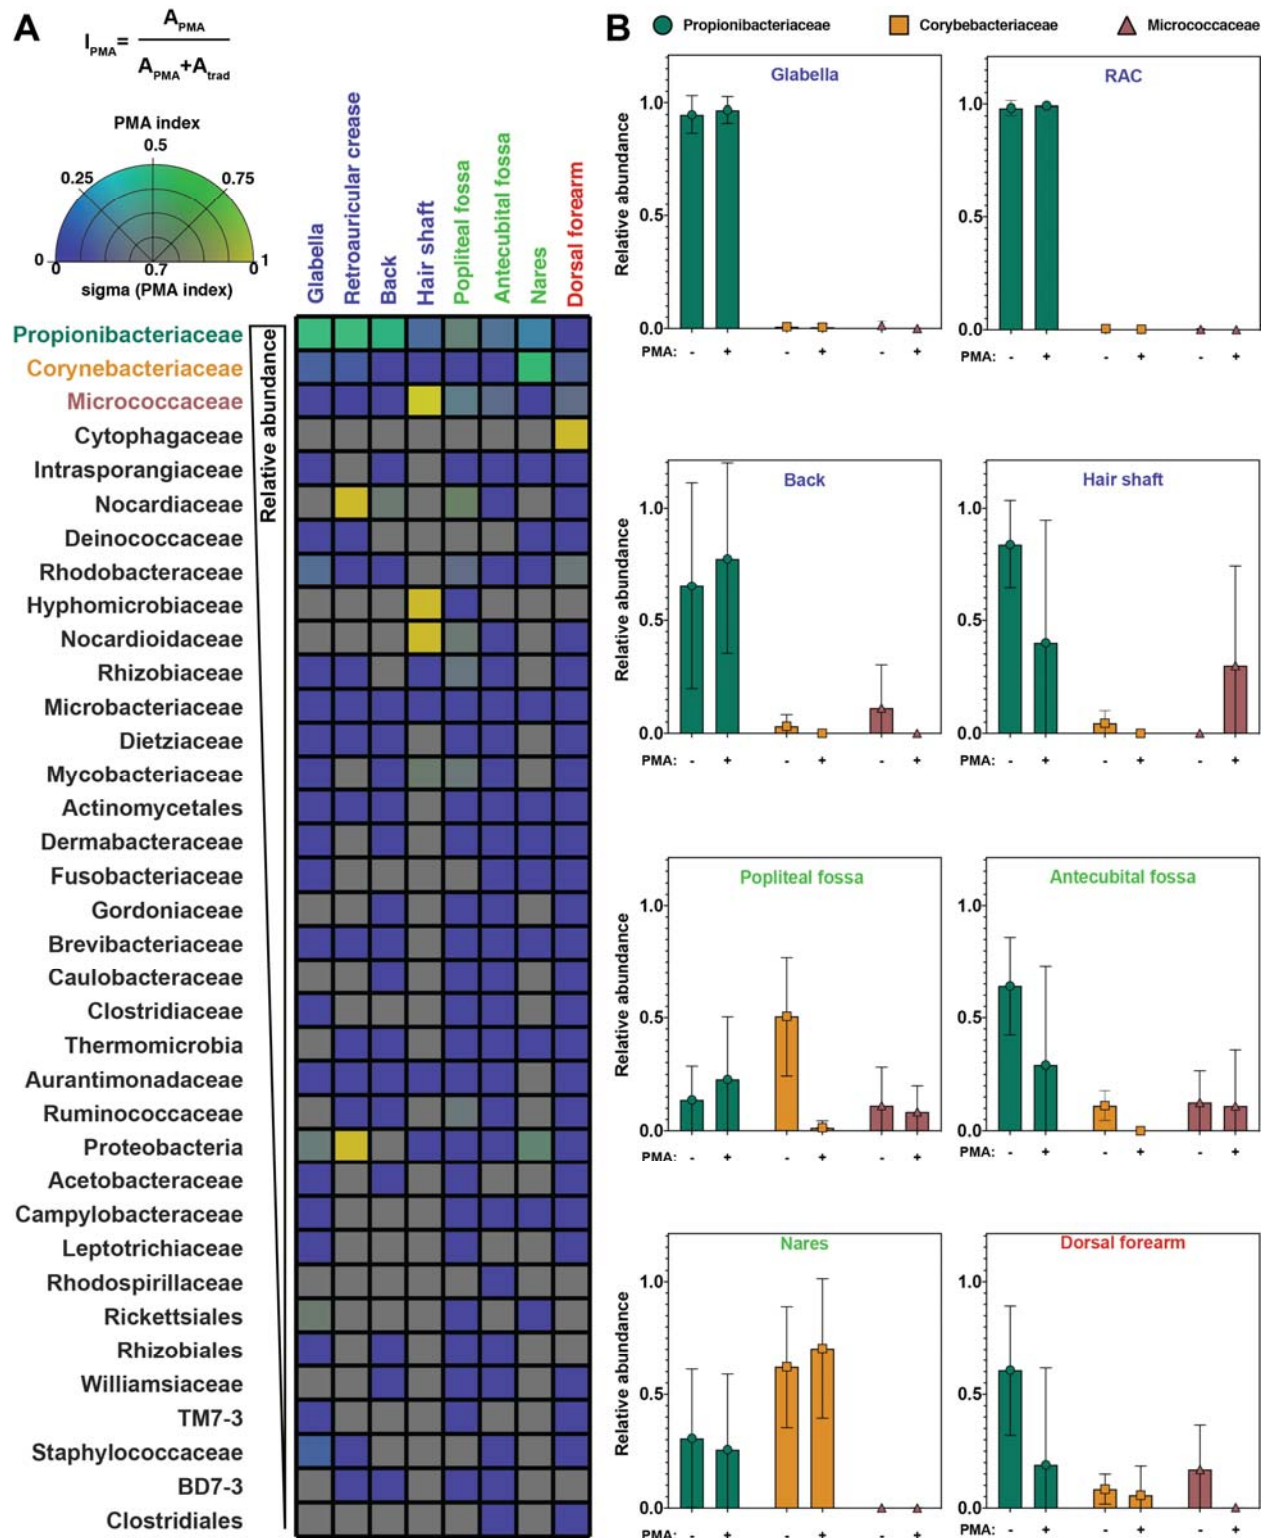

357

358 **Fig. 4.** PMA index. (A) The PMA index for each bacterial taxon that was present in at least 4  
 359 samples is shown here as an average between samples of the same sample site. Color indicates

360 PMA index value. Saturation indicates confidence ( $\sigma$ ) in the PMA index value and was  
361 calculated using the standard deviation of PMA index across the samples that went into that  
362 pixel. Bacterial taxa are ordered by decreasing overall relative abundance. Each square  
363 represents the average of at least four samples taken from different individuals. PMA-index is  
364 calculated by comparing the relative abundance of a given taxon as measured by PMA-seq  
365 ( $A_{\text{PMA}}$ ) to the sum of the relative abundance for that taxon in both traditional sequencing ( $A_{\text{trad}}$ )  
366 and PMA-seq. (B) Relative abundance at each body site for the top three most abundant (overall)  
367 bacterial taxa as assessed by traditional sequencing and PMA-seq. Colors of bars correspond to  
368 colors in Figure 2F.  
369

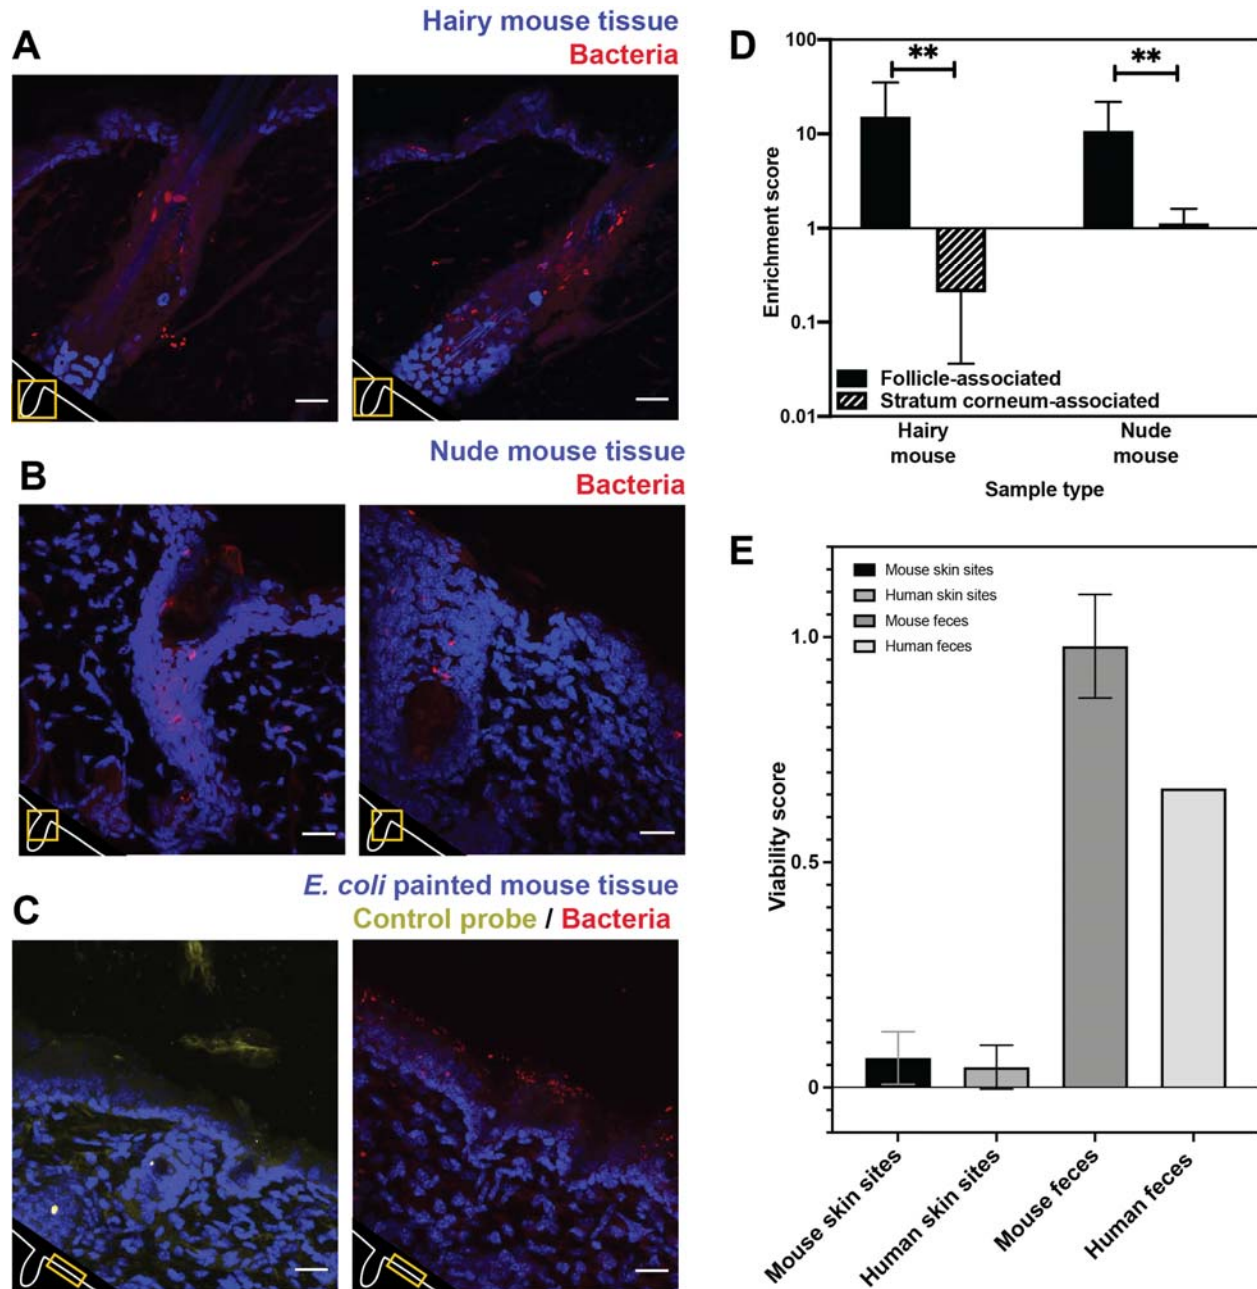

370  
371 **Fig 5.** Bacterial FISH staining of mouse tissue (A-D) and comparison of mouse viability scores

372 and human viability scores. (A). Tissues from a K14-H2B\_GFP mouse stained with EUB338  
373 show abundant bacterial signal in hair follicles but not on the skin surface. (B) Tissues from  
374 SKH1-Hrhr Elite nude mice also show bacterial presence concentrated to cutaneous structures  
375 and not at the skin surface. (C) *E. coli* applied to C57BL/6 mouse tissue was stained with either  
376 EUB338 (in red) or its complementary strand control probe NONEUB338 (in yellow). (D)

377 Quantification enrichment scores showing the median and interquartile range. Significance was  
378 calculated using the Mann-Whitney test. \* $P \leq 0.05$ , \*\* $P \leq 0.01$ ,  $N = 6$  for hairy mouse follicle,  
379 nude mouse follicle, and hairy mouse stratum corneum,  $N = 5$  nude mouse stratum corneum. (E)  
380 The PMA-ddPCR-based viability scores for mouse skin microbiomes are much lower than for  
381 mouse fecal microbiomes (0.66 and 0.98 respectively). These viability scores for mouse sites are  
382 very similar to those for humans (0.66 and 0.45 for skin microbiomes, 0.98 and 0.66 for fecal  
383 microbiomes).  
384



## 385 **Materials and Methods**

### 386 **Human and mouse tissue processing**

387 Human tissue was obtained through the Skin Translational Research Core within the Skin  
388 Biology and Diseases Resource-based Center (SBDRC) at the University of Pennsylvania.  
389 Samples were obtained from healthy tissue in patients undergoing skin surgical procedures.  
390 Samples were embedded in OCT and stored at -80°C prior to sectioning.

391 All mice were housed and maintained in a certified animal facility and all experiments  
392 were conducted according to USA Public Health Service Policy of Humane Care and Use of  
393 Laboratory Animals. All protocols were approved by the Institutional Animal Care and Use  
394 Committee, protocol #1867-17 (Princeton University). Dorsal skin from K14-H2B-GFP,  
395 C57BL/6, and SKH1-Elite nude mice was used for fluorescence experiments. The fur from K14-  
396 H2B-GFP and C57BL/6 mice was shaved using clippers prior to embedding in OCT. Both sexes  
397 were used.

398

### 399 **Fluorescence in situ hybridization and imaging**

400 Human and mouse tissues were processed identically. 30 µm tissue sections were  
401 sectioned and mounted on slides using a Leica CM3050S cryostat. Tissues on slides were fixed  
402 in 4% formaldehyde in 1X PBS for 20 mins. Following fixation, tissues were washed for 5 mins  
403 in 1X PBS and then incubated in hybridization buffer (0.9 M NaCl, 20 mM Tris-HCl, 10%  
404 formamide) containing 10 mg/mL lysozyme and FISH probes at 1 µg/µL for 2-3 hours at 47°C in  
405 the dark. Nucleotide sequences of FISH probes can be found in Table S1. After hybridization,  
406 slides were incubated in wash buffer (0.9 M NaCl, 20 mM Tris-HCl) for 1 hr at 47°C in the dark.  
407 Slides were then washed in 1X PBS for 10 mins. To visualize tissue nuclei, tissues were then

408 stained with 1  $\mu\text{g}/\text{mL}$  DAPI for 10 mins at room temperature. Slides were then washed 3X in 1X  
409 PBS for 10 mins each. Following the final wash step, tissues were mounted with glycerol-based  
410 anti-fade non-curing mounting media. Coverslips were sealed using a 1:1:1 mixture of petroleum  
411 jelly, lanolin, and paraffin. Images were acquired on a Nikon A1R-Si HD confocal microscope  
412 controlled by NIS Elements software. ImageJ and MATLAB (Mathworks, Natwick, MA) were  
413 used for image processing. To calculate fluorescence enrichment scores, maximum projections  
414 of Z-stacks were used. A rectangular region of interest (ROI) of width  $W$  was drawn around a  
415 follicle using only the DAPI channel. A second ROI was drawn near the follicle opening with  
416 dimensions  $0.5W \times 2W$  in order to capture follicle-associated fluorescence near the follicle  
417 opening. In an orthogonal processing step, the pixel intensities for the entire image in the FISH  
418 fluorescent channel were fit using a 3 component Gaussian mixture model (GMM)  
419 corresponding roughly to non-tissue background, non-probe autofluorescence, and probe-based  
420 signal. Using this GMM as the background subtraction value for each image, the mean intensity  
421 for each ROI was calculated. This threshold value was used to calculate the mean fluorescence  
422 value inside the ROI and outside the ROI. The ratio of the mean fluorescence value inside the  
423 ROI to the mean fluorescence value outside of the ROI was used for quantifying follicle- and  
424 stratum corneum-associated fluorescence (enrichment score). Significance was calculated using  
425 the Mann-Whitney test.

426

### 427 **Human subject microbiome samples**

428 Microbiome samples were collected under Princeton University IRB #13003 at the  
429 Princeton University Department of Molecular Biology. Participants were healthy volunteers,

430 aged 26-35, with no history of chronic skin conditions or autoimmune disease and were not using  
431 antibiotics.

432 Skin microbiomes from healthy volunteers were collected using sterile foam-tipped  
433 collection swabs pre-moistened with sterile 1X DPBS. Though often included, we chose not to  
434 use detergent in the swabbing buffer in order to avoid negatively affecting bacterial cell  
435 membranes and altering viability scores. Fig. S1D shows how swabbing with and without 0.1%  
436 Triton X-100 (Sigma) affects viability scores, ddPCR results, and CFU. Areas of interest were  
437 sampled for 60 seconds before being re-suspended in sterile 1X DPBS. Tongue microbiome  
438 samples were collected using sterile foam-tipped collection swabs. Hair shaft samples were  
439 collected by plucking hairs and using only the bulb portion. Saliva was collected in sterile 50 mL  
440 conicals from healthy volunteers. Plaque was collected by scraping the teeth of healthy  
441 volunteers using sterile toothpicks and re-suspending the collection in sterile 1X DPBS. Murine  
442 fecal samples from C57BL/6 mice were collected during dissection. Human skin microbiome  
443 samples shown in Figure 2B-E were plated for CFU calculations prior to the addition of PMA.  
444 Samples were plated on blood agar plates (5% sheep blood in tryptic soy agar, VWR  
445 International) and grown for 24-48 hours aerobically or anaerobically.

446 The human fecal sample was collected by the Donia lab under Princeton University IRB  
447 #11606 and was gifted to the Gitai lab.

448

#### 449 **Heat-killed *E. coli* ratios**

450 In order to demonstrate the efficacy of PMA, known ratios of live and heat-killed *E. coli* cultures  
451 were mixed and subjected to PMA treatment. First, an overnight culture of *E. coli* NCM3722  
452 was back-diluted into fresh LB media at a ratio of 1:1000 and grown at 37°C for 4 hours to reach

453 mid-log. Half of the exponentially-growing culture was heat-killed by incubating at 70°C for 20  
454 minutes while the other half remained at room temperature. The heat-killed *E. coli* cultures were  
455 allowed to cool to room temperature before combining with non-heat-killed *E. coli* cultures to  
456 achieve a 50% (by volume) heat-killed mixture. For the 0% heat-killed, no heat-killed bacteria  
457 were added. Likewise, for the 100% heat-killed, only heat-killed bacteria were used. Each  
458 condition was mixed well and then split evenly between two sterile 1.5 mL microcentrifuge  
459 tubes.

460

#### 461 **Propidium monoazide (PMA) treatment and DNA isolation**

462 After collection, samples were split evenly between two sterile 1.5 mL microcentrifuge  
463 tubes. PMA (Biotium Inc.) was added to one of the two tubes to a final concentration of 50 µM.  
464 All tubes were incubated in the dark at room temperature for 10 mins before being exposed to  
465 light to cross-link PMA molecules using the PMA-Lite™ LED Photolysis Device (Biotium Inc.).  
466 DNA was then isolated from all samples using the DNeasy PowerSoil Kit (Qiagen). If  
467 lysostaphin (Sigma-Aldrich) was used, it was added following PMA activation and before DNA  
468 isolation to a final concentration of 0.1 mg/mL and incubated at room temperature for 30 mins.

469

#### 470 **Droplet digital PCR (ddPCR)**

471 The Bio Rad QX200 AutoDG Droplet Digital PCR System was used to quantify  
472 extracted DNA from microbiome samples and from pure bacterial cultures. Reaction mixtures  
473 contained 2x QX200 ddPCR EvaGreen Supermix and universal 16S qPCR primers at 10 nM  
474 concentrations in a total volume of 25 µL. Primer sequences can be found in Table S1. Reaction  
475 mixtures were transferred to sterile ddPCR 96-well plates (BioRad #12001925) which were

476 loaded into the QX200 Automated Droplet Generator. After droplet generation, the plate was  
477 heat-sealed using the PX1 PCR Plate Sealer (BioRad #1814000) and PCR was performed with a  
478 pre-step of 95 C for 5 minutes followed by 40 rounds of amplification with 60C, 1 minute  
479 extensions and a final hold temperature of 12 C using a C1000 Touch Thermal Cycler (BioRad  
480 #1851197). Samples were subsequently loaded into the QX200 Droplet Reader for  
481 quantification. Automatic thresholding was performed using the Quantasoft software and  
482 subsequently exported to Microsoft Excel for analysis. Significance was calculated using a  
483 Student's T-Test. To calculate the viability score for a given pair of “-PMA” and “+PMA”  
484 matched samples, the following calculation was done:  
485

$$\frac{\text{Copies per } 20 \mu\text{L without PMA}}{\text{Copies per } 20 \mu\text{L with PMA}}$$

486

#### 487 ***Staphylococcus epidermidis* ddPCR and CFU standard curve**

488 Cultures of *S. epidermidis* EGM 2-06 were grown in tryptic soy broth (TSB) overnight  
489 and diluted 1:1000 the following morning in TSB and grown for 4 hours until a final OD of 0.4.  
490 Tenfold dilutions of *S. epidermidis* culture were then prepared, plated for CFU on 5% sheep  
491 blood in tryptic soy agar (VWR International) and divided between two 1.5 mL microcentrifuge  
492 tubes. PMA was added to one tube for a final concentration of 50  $\mu\text{M}$  and the other tube was left  
493 untreated. PMA activation and DNA isolation was then done according to the methods outlined  
494 above.

495

#### 496 **16S rRNA gene amplicon sequencing**

497 DNA was isolated from microbiome samples (with and without PMA) using the DNeasy  
498 PowerSoil Kit (Qiagen). The V1-V3 region of the 16S gene was amplified using the primers 27F  
499 (5'- AGAGTTTGATCCTGGCTCAG) and 534R (5'- ATTACCGCGGCTGCTGG). Illumina  
500 sequencing libraries were prepared using previously published primers (28). Libraries were then  
501 pooled at equimolar ratios and sequenced on an Illumina MiSeq Micro 500 nt as paired-end  
502 reads. Reads were 2X250 bp with an average depth of ~33,616 reads. Also included were 8 bp  
503 Index reads, following the manufacturer's protocol (Illumina, USA). Raw sequencing reads were  
504 filtered by Illumina HiSeq Control Software to generate Pass-Filter reads for further analysis.  
505 Index reads were used for sample de-multiplexing. Amplicon sequencing variants (ASVs) were  
506 then inferred from the unmerged paired-end sequences using the DADA2 plugin within QIIME2  
507 version 2018.6 (29, 30). Reads were not trimmed. Taxonomy was assigned to the resulting ASVs  
508 with a naive Bayes classifier trained on the Greengenes database version using only the target  
509 region of the 16S rRNA gene. 13.8 (31, 32). All downstream analyses were performed using  
510 family-level taxonomy assignments. Sequencing counts that were present in blank controls were  
511 subtracted. Relative abundance, richness, Shannon diversity, and PMA-index were assessed  
512 using the Vegan package for R or Microsoft Excel and plotted using R, Prism, and MATLAB  
513 (33). The PMA-index was calculated using relative abundance and was not calculated for any  
514 bacterial taxa that was present in fewer than four samples.

515

#### 516 **Data availability**

517 The datasets generated during and/or analyzed during the current study are available from the  
518 corresponding author on reasonable request.

519

520 **References**

- 521 1. R. L. Gallo, Human Skin Is the Largest Epithelial Surface for Interaction with Microbes.  
522 *J. Invest. Dermatol.* **137** (2017), pp. 1213–1214.
- 523 2. K. Maeda, New method of measurement of epidermal turnover in humans. *Cosmetics*  
524 (2017), doi:10.3390/cosmetics4040047.
- 525 3. T. C. Scharschmidt, K. S. Vasquez, H. A. Truong, S. V. Gearty, M. L. Pauli, A. Nosbaum,  
526 I. K. Gratz, M. Otto, J. J. Moon, J. Liese, A. K. Abbas, M. A. Fischbach, M. D.  
527 Rosenblum, A Wave of Regulatory T Cells into Neonatal Skin Mediates Tolerance to  
528 Commensal Microbes. *Immunity.* **43**, 1011–1021 (2015).
- 529 4. K. Polak-Witka, L. Rudnicka, U. Blume-Peytavi, A. Vogt, The role of the microbiome in  
530 scalp hair follicle biology and disease. *Exp. Dermatol.* (2020), , doi:10.1111/exd.13935.
- 531 5. L. R. Kalan, J. S. Meisel, M. A. Loesche, J. Horwinski, I. Soaita, X. Chen, A. Uberoi, S.  
532 E. Gardner, E. A. Grice, Strain- and Species-Level Variation in the Microbiome of  
533 Diabetic Wounds Is Associated with Clinical Outcomes and Therapeutic Efficacy. *Cell*  
534 *Host Microbe* (2019), doi:10.1016/j.chom.2019.03.006.
- 535 6. J. H. Kim, B. Yang, A. Tedesco, E. G. D. Lebig, P. M. Ruegger, K. Xu, J. Borneman, M.  
536 Martins-Green, High Levels of Oxidative Stress and Skin Microbiome are Critical for  
537 Initiation and Development of Chronic Wounds in Diabetic Mice. *Sci. Rep.* **9**, 1–16  
538 (2019).
- 539 7. M. Loesche, S. E. Gardner, L. Kalan, J. Horwinski, Q. Zheng, B. P. Hodkinson, A. S.  
540 Tyldsley, C. L. Franciscus, S. L. Hillis, S. Mehta, D. J. Margolis, E. A. Grice, Temporal  
541 Stability in Chronic Wound Microbiota Is Associated With Poor Healing. *J. Invest.*  
542 *Dermatol.* **137**, 237–244 (2017).

- 543 8. A. L. Byrd, Y. Belkaid, J. A. Segre, The human skin microbiome. *Nat. Rev. Microbiol.*  
544 (2018), , doi:10.1038/nrmicro.2017.157.
- 545 9. J. S. Meisel, G. Sfyroera, C. Bartow-McKenney, C. Gimblet, J. Bugayev, J. Horwinski, B.  
546 Kim, J. R. Brestoff, A. S. Tyldsley, Q. Zheng, B. P. Hodkinson, D. Artis, E. A. Grice,  
547 Commensal microbiota modulate gene expression in the skin. *Microbiome* (2018),  
548 doi:10.1186/s40168-018-0404-9.
- 549 10. T. C. Scharschmidt, K. S. Vasquez, M. L. Pauli, E. G. Leitner, K. Chu, H. A. Truong, M.  
550 M. Lowe, R. Sanchez Rodriguez, N. Ali, Z. G. Laszik, J. L. Sonnenburg, S. E. Millar, M.  
551 D. Rosenblum, Commensal Microbes and Hair Follicle Morphogenesis Coordinately  
552 Drive Treg Migration into Neonatal Skin. *Cell Host Microbe* (2017),  
553 doi:10.1016/j.chom.2017.03.001.
- 554 11. M. C. Nielsen, S. C. Jiang, Alterations of the human skin microbiome after ocean water  
555 exposure. *Mar. Pollut. Bull.* (2019), doi:10.1016/j.marpolbul.2019.06.047.
- 556 12. A. L. Byrd, Y. Belkaid, J. A. Segre, The human skin microbiome. *Nat. Rev. Microbiol.* **16**  
557 (2018), pp. 143–155.
- 558 13. E. A. Grice, J. A. Segre, The skin microbiome. *Nat. Rev. Microbiol.* (2011), ,  
559 doi:10.1038/nrmicro2537.
- 560 14. C. Huttenhower, D. Gevers, R. Knight, S. Abubucker, J. H. Badger, A. T. Chinwalla, H.  
561 H. Creasy, A. M. Earl, M. G. Fitzgerald, R. S. Fulton, M. G. Giglio, K. Hallsworth-Pepin,  
562 E. A. Lobos, R. Madupu, V. Magrini, J. C. Martin, M. Mitreva, D. M. Muzny, E. J.  
563 Sodergren, J. Versalovic, A. M. Wollam, K. C. Worley, J. R. Wortman, S. K. Young, Q.  
564 Zeng, K. M. Aagaard, O. O. Abolude, E. Allen-Vercoe, E. J. Alm, L. Alvarado, G. L.  
565 Andersen, S. Anderson, E. Appelbaum, H. M. Arachchi, G. Armitage, C. A. Arze, T.



566 Ayvaz, C. C. Baker, L. Begg, T. Belachew, V. Bhonagiri, M. Bihan, M. J. Blaser, T.  
567 Bloom, V. Bonazzi, J. Paul Brooks, G. A. Buck, C. J. Buhay, D. A. Busam, J. L.  
568 Campbell, S. R. Canon, B. L. Cantarel, P. S. G. Chain, I. M. A. Chen, L. Chen, S.  
569 Chhibba, K. Chu, D. M. Ciulla, J. C. Clemente, S. W. Clifton, S. Conlan, J. Crabtree, M.  
570 A. Cutting, N. J. Davidovics, C. C. Davis, T. Z. Desantis, C. Deal, K. D. Delehaunty, F. E.  
571 Dewhurst, E. Deych, Y. Ding, D. J. Dooling, S. P. Dugan, W. Michael Dunne, A. Scott  
572 Durkin, R. C. Edgar, R. L. Erlich, C. N. Farmer, R. M. Farrell, K. Faust, M. Feldgarden,  
573 V. M. Felix, S. Fisher, A. A. Fodor, L. J. Forney, L. Foster, V. Di Francesco, J. Friedman,  
574 D. C. Friedrich, C. C. Fronick, L. L. Fulton, H. Gao, N. Garcia, G. Giannoukos, C. Giblin,  
575 M. Y. Giovanni, J. M. Goldberg, J. Goll, A. Gonzalez, A. Griggs, S. Gujja, S. Kinder  
576 Haake, B. J. Haas, H. A. Hamilton, E. L. Harris, T. A. Hepburn, B. Herter, D. E.  
577 Hoffmann, M. E. Holder, C. Howarth, K. H. Huang, S. M. Huse, J. Izard, J. K. Jansson, H.  
578 Jiang, C. Jordan, V. Joshi, J. A. Katancik, W. A. Keitel, S. T. Kelley, C. Kells, N. B. King,  
579 D. Knights, H. H. Kong, O. Koren, S. Koren, K. C. Kota, C. L. Kovar, N. C. Kyrpides, P.  
580 S. La Rosa, S. L. Lee, K. P. Lemon, N. Lennon, C. M. Lewis, L. Lewis, R. E. Ley, K. Li,  
581 K. Liolios, B. Liu, Y. Liu, C. C. Lo, C. A. Lozupone, R. Dwayne Lunsford, T. Madden, A.  
582 A. Mahurkar, P. J. Mannon, E. R. Mardis, V. M. Markowitz, K. Mavromatis, J. M.  
583 McCorrison, D. McDonald, J. McEwen, A. L. McGuire, P. McInnes, T. Mehta, K. A.  
584 Mihindukulasuriya, J. R. Miller, P. J. Minx, I. Newsham, C. Nusbaum, M. Oglaughlin, J.  
585 Orvis, I. Pagani, K. Palaniappan, S. M. Patel, M. Pearson, J. Peterson, M. Podar, C. Pohl,  
586 K. S. Pollard, M. Pop, M. E. Priest, L. M. Proctor, X. Qin, J. Raes, J. Ravel, J. G. Reid, M.  
587 Rho, R. Rhodes, K. P. Riehle, M. C. Rivera, B. Rodriguez-Mueller, Y. H. Rogers, M. C.  
588 Ross, C. Russ, R. K. Sanka, P. Sankar, J. Fah Sathirapongsasuti, J. A. Schloss, P. D.

- 589 Schloss, T. M. Schmidt, M. Scholz, L. Schriml, A. M. Schubert, N. Segata, J. A. Segre,  
590 W. D. Shannon, R. R. Sharp, T. J. Sharpton, N. Shenoy, N. U. Sheth, G. A. Simone, I.  
591 Singh, C. S. Smillie, J. D. Sobel, D. D. Sommer, P. Spicer, G. G. Sutton, S. M. Sykes, D.  
592 G. Tabbaa, M. Thiagarajan, C. M. Tomlinson, M. Torralba, T. J. Treangen, R. M. Truty,  
593 T. A. Vishnivetskaya, J. Walker, L. Wang, Z. Wang, D. V. Ward, W. Warren, M. A.  
594 Watson, C. Wellington, K. A. Wetterstrand, J. R. White, K. Wilczek-Boney, Y. Wu, K.  
595 M. Wylie, T. Wylie, C. Yandava, L. Ye, Y. Ye, S. Yooseph, B. P. Youmans, L. Zhang, Y.  
596 Zhou, Y. Zhu, L. Zoloth, J. D. Zucker, B. W. Birren, R. A. Gibbs, S. K. Highlander, B. A.  
597 Methé, K. E. Nelson, J. F. Petrosino, G. M. Weinstock, R. K. Wilson, O. White, Structure,  
598 function and diversity of the healthy human microbiome. *Nature* (2012),  
599 doi:10.1038/nature11234.
- 600 15. Y. Belkaid, S. Tamoutounour, The influence of skin microorganisms on cutaneous  
601 immunity. *Nat. Rev. Immunol.* (2016), , doi:10.1038/nri.2016.48.
- 602 16. M. B. Lousada, T. Lachnit, J. Edelkamp, T. Rouillé, D. Ajdic, Y. Uchida, A. Di Nardo, T.  
603 C. G. Bosch, R. Paus, Exploring the human hair follicle microbiome\*. *Br. J. Dermatol.*  
604 (2021), , doi:10.1111/bjd.19461.
- 605 17. R. I. Amann, B. J. Binder, R. J. Olson, S. W. Chisholm, R. Devereux, D. A. Stahl',  
606 "Combination of 16S rRNA-Targeted Oligonucleotide Probes with Flow Cytometry for  
607 Analyzing Mixed Microbial Populations" (1990).
- 608 18. R. D. Bjerre, L. W. Hugerth, F. Boulund, M. Seifert, J. D. Johansen, L. Engstrand, Effects  
609 of sampling strategy and DNA extraction on human skin microbiome investigations. *Sci.*  
610 *Rep.* **9**, 1–11 (2019).
- 611 19. A. Nocker, C. Y. Cheung, A. K. Camper, Comparison of propidium monoazide with

- 612 ethidium monoazide for differentiation of live vs. dead bacteria by selective removal of  
613 DNA from dead cells. *J. Microbiol. Methods*. **67**, 310–320 (2006).
- 614 20. Y. Yang, D. Cheng, Y. Li, L. Yu, K. Y. H. Gin, J. P. Chen, M. Reinhard, Effects of  
615 monochloramine and hydrogen peroxide on the bacterial community shifts in biologically  
616 treated wastewater. *Chemosphere* (2017), doi:10.1016/j.chemosphere.2017.09.087.
- 617 21. A. Nocker, T. Richter-Heitmann, R. Montijn, F. Schuren, R. Kort, Discrimination between  
618 live and dead cells in bacterial communities from environmental water samples analyzed  
619 by 454 pyrosequencing. *Int. Microbiol.* (2010), doi:10.2436/20.1501.01.111.
- 620 22. Q. Liu, Q. Liu, H. Meng, H. Lv, Y. Liu, J. Liu, H. Wang, L. He, J. Qin, Y. Wang, Y. Dai,  
621 M. Otto, M. Li, Staphylococcus epidermidis Contributes to Healthy Maturation of the  
622 Nasal Microbiome by Stimulating Antimicrobial Peptide Production. *Cell Host Microbe*.  
623 **27**, 68-78.e5 (2020).
- 624 23. E. A. Grice, H. H. Kong, S. Conlan, C. B. Deming, J. Davis, A. C. Young, N. C. S. NISC  
625 Comparative Sequencing Program, G. G. Bouffard, R. W. Blakesley, P. R. Murray, E. D.  
626 Green, M. L. Turner, J. A. Segre, Topographical and temporal diversity of the human skin  
627 microbiome. *Science* (2009), doi:10.1126/science.1171700.
- 628 24. S. Huang, N. Haiminen, A.-P. Carrieri, R. Hu, L. Jiang, L. Parida, B. Russell, C. Allaband,  
629 A. Zarrinpar, Y. Vázquez-Baeza, P. Belda-Ferre, H. Zhou, H.-C. Kim, A. D. Swafford, R.  
630 Knight, Z. Z. Xu, Human Skin, Oral, and Gut Microbiomes Predict Chronological Age.  
631 *mSystems* (2020), doi:10.1128/msystems.00630-19.
- 632 25. Y. Yu, S. Dunaway, J. Champer, J. Kim, A. Alikhan, Changing our microbiome:  
633 probiotics in dermatology. *Br. J. Dermatol.* (2020), , doi:10.1111/bjd.18088.
- 634 26. J. Oh, A. L. Byrd, M. Park, H. H. Kong, J. A. Segre, Temporal Stability of the Human

- 635 Skin Microbiome. *Cell* (2016), doi:10.1016/j.cell.2016.04.008.
- 636 27. W. Van't Hof, E. C. I. Veerman, A. V. N. Amerongen, A. J. M. Ligtenberg,  
637 Antimicrobial defense systems in saliva. *Monogr. Oral Sci.* (2014),  
638 doi:10.1159/000358783.
- 639 28. J. G. Caporaso, C. L. Lauber, W. A. Walters, D. Berg-Lyons, J. Huntley, N. Fierer, S. M.  
640 Owens, J. Betley, L. Fraser, M. Bauer, N. Gormley, J. A. Gilbert, G. Smith, R. Knight,  
641 Ultra-high-throughput microbial community analysis on the Illumina HiSeq and MiSeq  
642 platforms. *ISME J.* (2012), doi:10.1038/ismej.2012.8.
- 643 29. E. Bolyen, J. R. Rideout, M. Dillon, N. Bokulich, C. Abnet, G. Al-Ghalith, H. Alexander,  
644 E. Alm, M. Arumugam, F. Asnicar, Y. Bai, J. Bisanz, K. Bittinger, A. Brejnrod, C.  
645 Brislawn, C. T. Brown, B. Callahan, A. M. Caraballo-Rodríguez, J. Chase, E. Cope, R. Da  
646 Silva, P. Dorrestein, G. Douglas, D. Durall, C. Duvallet, C. Edwardson, M. Ernst, M.  
647 Estaki, J. Fouquier, J. Gauglitz, D. Gibson, A. Gonzalez, K. Gorlick, J. Guo, B. Hillmann,  
648 S. Holmes, H. Holste, C. Huttenhower, G. Huttley, S. Janssen, A. Jarmusch, L. Jiang, B.  
649 Kaehler, K. Bin Kang, C. Keefe, P. Keim, S. Kelley, D. Knights, I. Koester, T. Kosciolk,  
650 J. Kreps, M. G. Langille, J. Lee, R. Ley, Y.-X. Liu, E. Loftfield, C. Lozupone, M. Maher,  
651 C. Marotz, B. Martin, D. McDonald, L. McIver, A. Melnik, J. Metcalf, S. Morgan, J.  
652 Morton, A. T. Naimey, J. Navas-Molina, L. F. Nothias, S. Orchanian, T. Pearson, S.  
653 Peoples, D. Petras, M. L. Preuss, E. Pruesse, L. B. Rasmussen, A. Rivers, M. Robeson, II,  
654 P. Rosenthal, N. Segata, M. Shaffer, A. Shiffer, R. Sinha, S. J. Song, J. Spear, A.  
655 Swafford, L. Thompson, P. Torres, P. Trinh, A. Tripathi, P. Turnbaugh, S. Ul-Hasan, J. J.  
656 van der Hooft, F. Vargas, Y. Vázquez-Baeza, E. Vogtmann, M. von Hippel, W. Walters,  
657 Y. Wan, M. Wang, J. Warren, K. Weber, C. H. Williamson, A. Willis, Z. Z. Xu, J.

- 658 Zaneveld, Y. Zhang, Q. Zhu, R. Knight, J. G. Caporaso, QIIME 2: Reproducible,  
659 interactive, scalable, and extensible microbiome data science. *PeerJ* (2018),  
660 doi:10.7287/peerj.preprints.27295.
- 661 30. B. J. Callahan, P. J. McMurdie, M. J. Rosen, A. W. Han, A. J. A. Johnson, S. P. Holmes,  
662 DADA2: High-resolution sample inference from Illumina amplicon data. *Nat. Methods*  
663 (2016), doi:10.1038/nmeth.3869.
- 664 31. N. A. Bokulich, B. D. Kaehler, J. R. Rideout, M. Dillon, E. Bolyen, R. Knight, G. A.  
665 Huttley, J. Gregory Caporaso, Optimizing taxonomic classification of marker-gene  
666 amplicon sequences with QIIME 2's q2-feature-classifier plugin. *Microbiome* (2018),  
667 doi:10.1186/s40168-018-0470-z.
- 668 32. D. McDonald, M. N. Price, J. Goodrich, E. P. Nawrocki, T. Z. Desantis, A. Probst, G. L.  
669 Andersen, R. Knight, P. Hugenholtz, An improved Greengenes taxonomy with explicit  
670 ranks for ecological and evolutionary analyses of bacteria and archaea. *ISME J.* (2012),  
671 doi:10.1038/ismej.2011.139.
- 672 33. J. Oksanen, F. G. Blanchet, M. Friendly, R. Kindt, P. Legendre, D. Mcglinn, P. R.  
673 Minchin, R. B. O'Hara, G. L. Simpson, P. Solymos, M. H. H. Stevens, E. Szoecs, H.  
674 Wagner, vegan: Community Ecology Package. R package version 2.4-2. *Community Ecol.*  
675 *Packag.* (2019).
- 676 34. T. Mohammadi, H. W. Reesink, C. M. J. E. Vandenbroucke-Grauls, P. H. M. Savelkoul,  
677 Optimization of real-time PCR assay for rapid and sensitive detection of eubacterial 16S  
678 ribosomal DNA in platelet concentrates. *J. Clin. Microbiol.* (2003),  
679 doi:10.1128/JCM.41.10.4796-4798.2003.
- 680 35. G. Wallner, R. Amann, W. Beisker, Optimizing fluorescent in situ hybridization with

681 rRNA-targeted oligonucleotide probes for flow cytometric identification of  
682 microorganisms. *Cytometry* (1993), doi:10.1002/cyto.990140205.

683 36. O. A. Alexeyev, I. Marklund, B. Shannon, I. Golovleva, J. Olsson, C. Andersson, I.  
684 Eriksson, R. Cohen, F. Elgh, Direct visualization of *Propionibacterium acnes* in prostate  
685 tissue by multicolor fluorescent in situ hybridization assay. *J. Clin. Microbiol.* (2007),  
686 doi:10.1128/JCM.01543-07.

687 37. J. Oh, A. L. Byrd, C. Deming, S. Conlan, H. H. Kong, J. A. Segre, B. Barnabas, R.  
688 Blakesley, G. Bouffard, S. Brooks, H. Coleman, M. Dekhtyar, M. Gregory, X. Guan, J.  
689 Gupta, J. Han, S. L. Ho, R. Legaspi, Q. Maduro, C. Masiello, B. Maskeri, J. McDowell, C.  
690 Montemayor, J. Mullikin, M. Park, N. Riebow, K. Schandler, B. Schmidt, C. Sison, M.  
691 Stantripop, J. Thomas, P. Thomas, M. Vemulapalli, A. Young, Biogeography and  
692 individuality shape function in the human skin metagenome. *Nature* (2014),  
693 doi:10.1038/nature13786.

694

695

696 **Acknowledgments:** We thank all members of the Gitai lab for their insights and comments. We  
697 also thank Dr. Gary Laevsky and the Princeton Molecular Biology Microscopy Core, which is a  
698 Nikon Center of Excellence, for microscopy support; Dr. Wei Wang and the Genomics Core  
699 Facility in The Lewis Sigler Institute for Integrative Genomics at Princeton University for  
700 support with 16S rRNA gene amplicon sequencing; Matthew Cahn and Jaime Lopez for their  
701 assistance with processing 16S rRNA gene amplicon sequencing data; Bahar Javdan for  
702 processing the human fecal sample; and Elizabeth Grice for support and feedback. **Funding:**  
703 Funding was provided in part by NIH (DP1AI124669 to Z.G., E.M.A., and B.P.B., and T32  
704 GM007388 to E.M.A). Additional funding provided by the National Science Foundation (NSF  
705 PHY-1734030 to B.P.B.). Research reported in this publication was also supported by the  
706 National Center for Advancing Translational Sciences of the National Institutes of Health under  
707 Award Number TL1TR003019 (E.M.A) and by the Schmidt Transformative Technology Fund  
708 (E.M.A.). This work was supported in part by the Penn Skin Biology and Diseases Resource-  
709 based Center (P30-AR068589). The contents are solely the responsibility of the authors and do  
710 not necessarily represent the official views of the respective funding agencies.

711

712 **Author contributions:** Conceptualization, Z.G., E.M.A., and D.D.; Methodology, Z.G., E.M.A.,  
713 and D.D.; Software, E.M.A. and B.P.B.; Formal Analysis, E.M.A. and B.P.B.; Investigation,  
714 E.M.A., K.A.L., and X.M.; Resources, Z. G., D.D., and A.P.; Writing – Original Draft, Z.G. and  
715 E.M.A.; Writing – Reviewing & Editing, Z.G., E.M.A., B.P.B., D.D., and A.P.; Visualization,  
716 E.M.A. Z.G., and B.P.B.; Supervision, Z.G., D.D., and A.P.; Funding Acquisition, Z.G.

717

718 **Competing interests:** Authors declare no competing interests.

719

720 **Materials and correspondence:** All data is available in the main text or the supplementary

721 materials. Additionally, the raw data that support the findings of this study are available from the

722 corresponding author upon request (Zemer Gitai, [zgitai@princeton.edu](mailto:zgitai@princeton.edu)).

723



724 **Supplementary information**

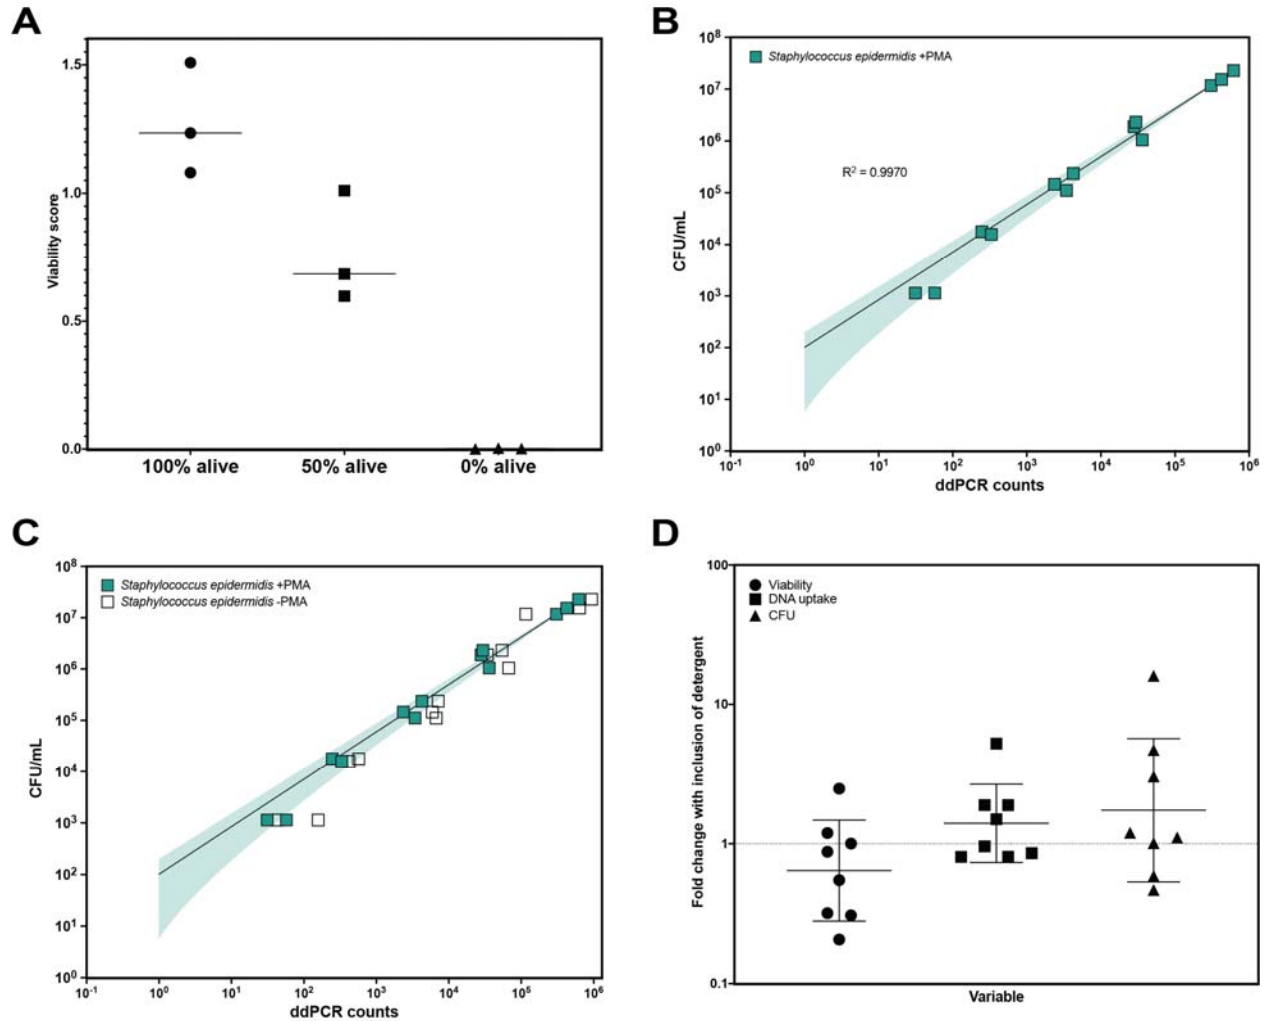

725 **Fig. S1.** PMA and sampling controls. (A) PMA-ddPCR validation controls on known ratios of  
726 heat-killed and exponentially-growing *E. coli* cultures. PMA-ddPCR performed on a population  
727 of exponentially-growing cells resulted in a viability score slightly above 1.0 (1.23), which was  
728 likely due to continued bacterial growth during the experiment. PMA-ddPCR performed on a  
729 population of 100% heat-killed cells resulted in a viability score of 0. Populations consisting of  
730 population of 100% heat-killed cells resulted in a viability score of 0. Populations consisting of  
731 50% (by volume) heat-killed and 50% exponentially-growing cells exhibited an average viability  
732 score of 0.69. (B) Standard curve showing correlation between PMA-ddPCR counts and CFU for  
733 exponentially-growing *Staphylococcus epidermidis*. 95% confidence interval is shown in the  
734 green shaded region. (C) The same standard curve as shown in (B) with the addition of *S.*

735 *epidermidis* that was not treated with PMA. (D) The effect of including 0.1% Triton X100 in

736 swabbing buffer used for skin microbiome sampling.

737

738

739

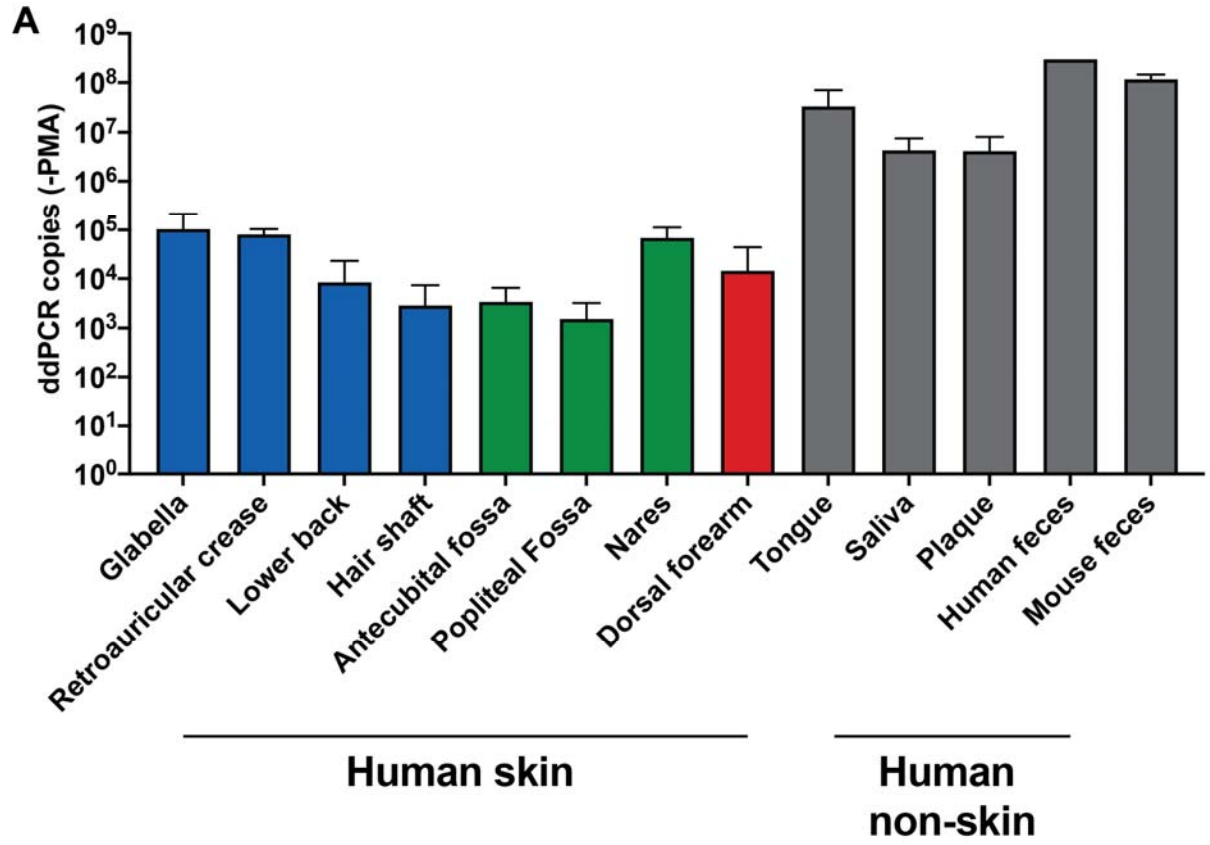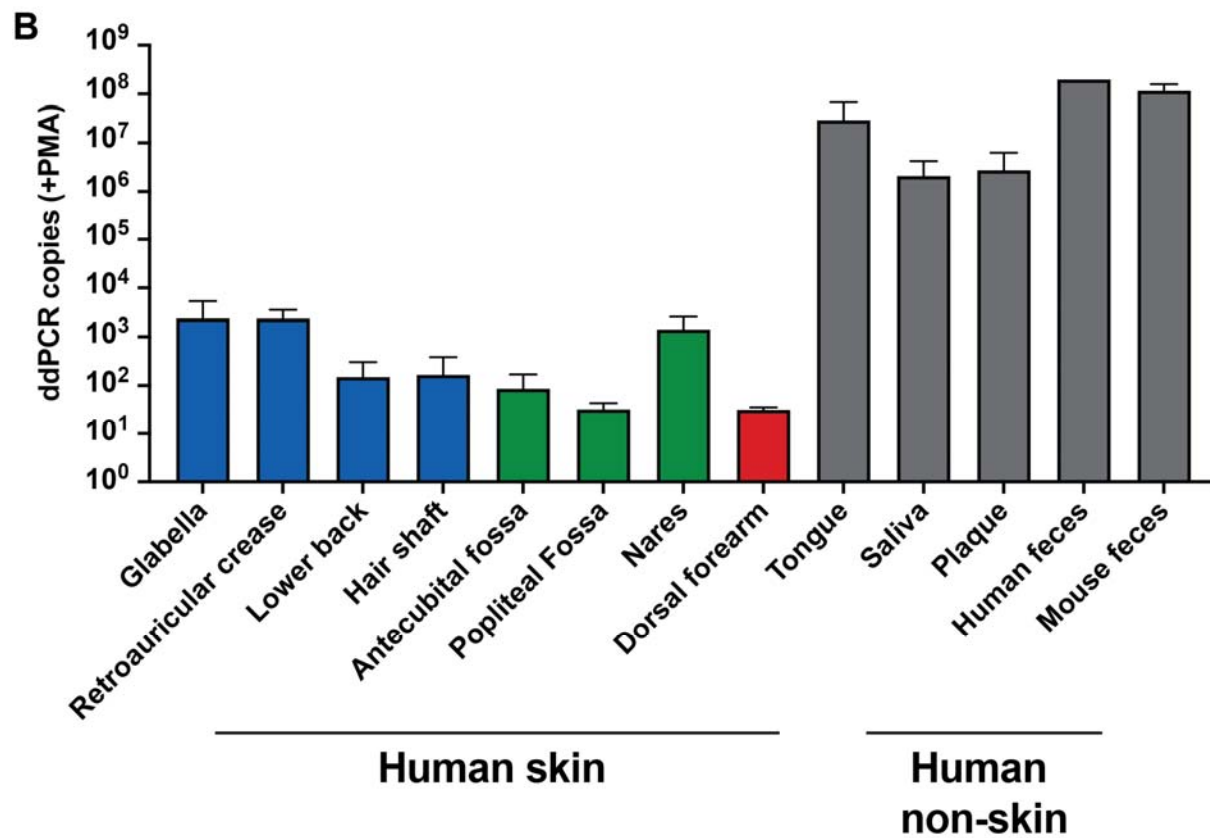

741 **Fig. S2.** Copies per 20  $\mu$ L ddPCR reaction without (A) and with (B) the use of PMA. These data  
742 were used to calculate the viability score shown in Fig. 2.  
743

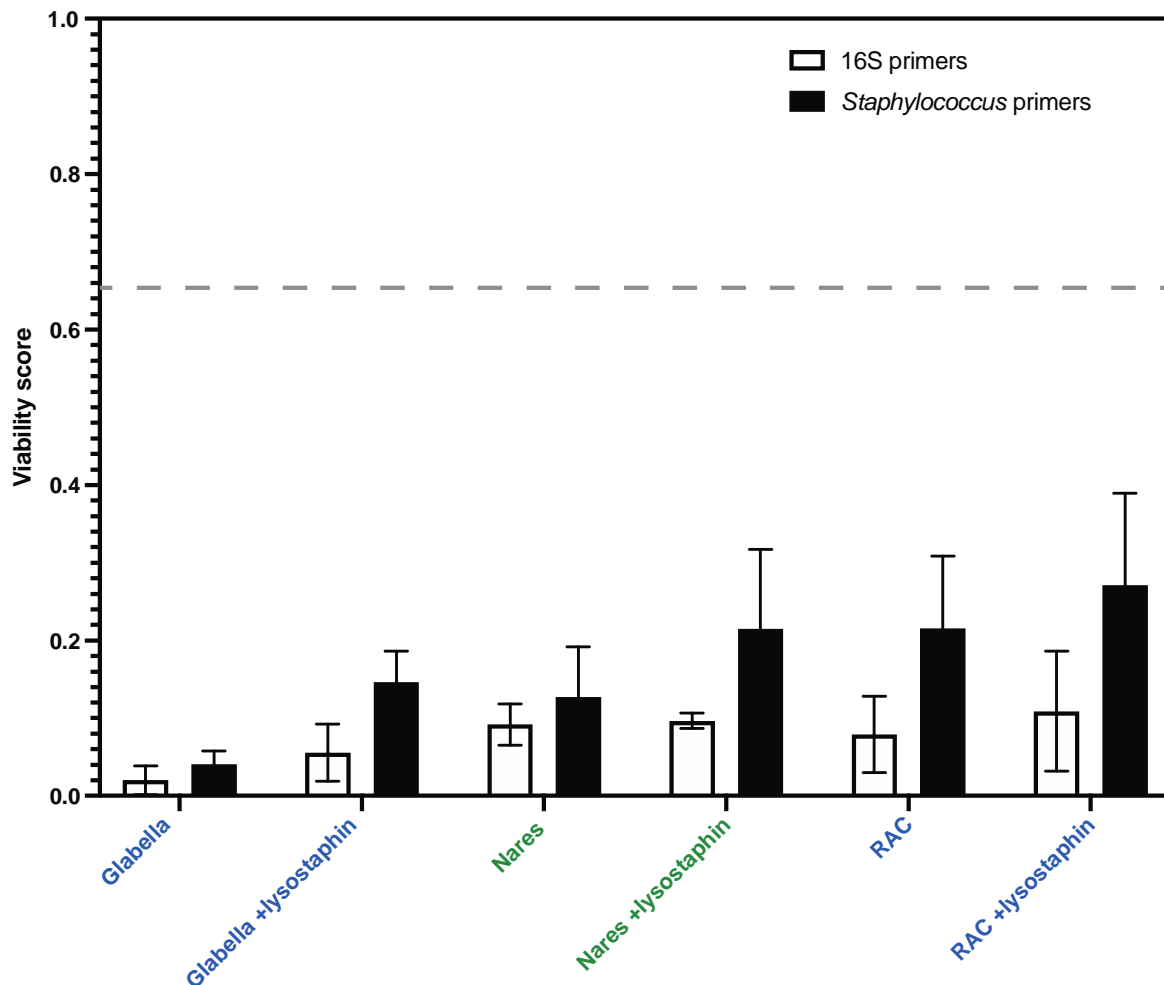

744  
745 **Fig. S3.** Viability score for three skin sites using lysostaphin and *Staphylococcus*-specific PCR  
746 primers. The three skin sites with the most abundant bacterial DNA are shown. Half of each  
747 sample was treated with lysostaphin prior to DNA isolation to assess how the viability score  
748 would change. ddPCR was performed on each sample using both 16S primers (white bars) and  
749 *Staphylococcus*-specific (black bars) primers. The dashed line indicates the average viability  
750 score of non-skin microbiome sites (0.66). N=3 for all.

751

| <b>Name</b> | <b>Description</b>                         | <b>Sequence (5' - 3')</b>          | <b>Reference</b> |
|-------------|--------------------------------------------|------------------------------------|------------------|
|             | ddPCR FP (Universal bacterial 16S qPCR FP) | TCCTACGGGAGGCAGCAGT                | (34)             |
|             | ddPCR RP (Universal bacterial 16S qPCR RP) | GGACTACCAGGGTATCTAATCCTGT<br>T     | (34)             |
| EFTU_FP     | Staph-specific ddPCR forward primer        | ATGCCACAAACTCGTGAACA               | this paper       |
| EFTU_RP     | Staph-specific ddPCR reverse primer        | ACATCGTCACCTGGGAAGTC               | this paper       |
| EUB338      | Pan-bacterial FISH probe                   | GCTGCCTCCCGTAGGAGT                 | (17)             |
| NonEUB338   | Nonsense control FISH probe                | CGACGGAGGGCATCCTCA                 | (35)             |
|             | C. acnes FISH probe                        | GAGTGTGTGAACCGATCATGTAGTA<br>GGCAA | (36)             |
| 27F         | Forward 16S sequencing primer              | AGAGTTTGATCCTGGCTCAG               | (37)             |
| 534R        | Reverse 16S sequencing primer              | ATTACCGCGGCTGCTGG                  | (37)             |

752 **Table S1.** Nucleotide sequences used in this study.

753
